# Supplementary material for: Enantioselective synthesis of seven-membered carbo- and heterocyles by organocatalyzed intramolecular Michael addition
Source: Royal Society of Chemistry journal article supplement (doi:10.1039/c6ra04198a), 2016-01-01
Supplement: c6ra04198a1.pdf [file c6ra04198a1.pdf]

## Supplementary Information

### **Enantioselective Synthesis of Seven-Membered Carbo- and Heterocycles by Organocatalyzed Intramolecular Michael Addition.**

**James O. Guevara-Pulido, José M. Andrés, Deisy P. Ávila and Rafael Pedrosa.\***

Instituto CINQUIMA and Departamento de Química Orgánica, Facultad de Ciencias, Universidad de Valladolid. Paseo de Belén 7. 47011-Valladolid. Spain

E-mail: [pedrosa@qo.uva.es](mailto:pedrosa@qo.uva.es)

Web: <http://sintesisasimetrica.blogs.uva.es>

#### **TABLE OF CONTENTS**

|                                                                                              |            |
|----------------------------------------------------------------------------------------------|------------|
| <b>1. Experimental procedure for the synthesis of starting and cyclization products.....</b> | <b>S2</b>  |
| <b>2. Copies of NMR Spectra for New Compounds .....</b>                                      | <b>S11</b> |
| <b>3. HPLC Profiles of the cyclization products .....</b>                                    | <b>S37</b> |

## Synthesis of diketoenones 2a-f

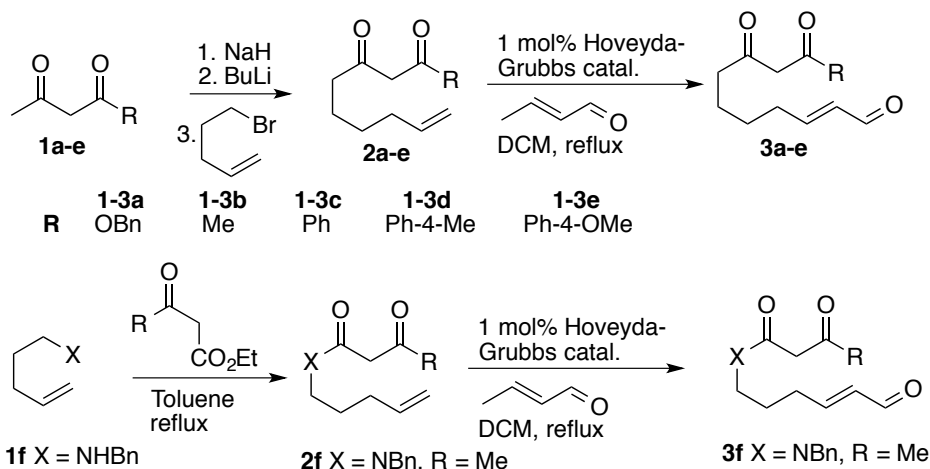

The alkylation of diketones was done by slight modification of a previously described methodology.<sup>1</sup> To a suspension of NaH (1.1 equiv., 9.7 mmol, 380 mg) in anhydrous THF (15 mL) cooled to 0 °C, under nitrogen atmosphere, was added a solution of the corresponding diketone (1 equiv., 8.7 mmol) in THF (5 mL). The solution was stirred for 15 min., and then a solution of n-BuLi (1.1 equiv., 9.7 mmol) was dropped, and the mixture was stirred for additional 15 min. To that mixture, a solution of corresponding bromide (1 equiv., 8.7 mmol) in THF (5 mL) was added and the stirring was continued until the reaction was finished (ca. 3 h., TLC). The reaction mixture was quenched by addition of 1M HCl (20 mL), the organic phase was washed, dried over MgSO<sub>4</sub>, the solvent evaporated under vacuum, and the residue purified by flash chromatography (silicagel, hexane/EtOAc), giving compounds **2a-e** in 70-90%.

**Benzyl 3-oxonon-8-enoate (2a)** <sup>1</sup>H-NMR (400 MHz, CDCl<sub>3</sub>) δ 7.35 (m, 5H); 5.77 (m, 1H); 5.17 (s, 2H); 4.97 (m, 2H); 3.47 (s, 2H); 2.50 (t, 2H); 2.03 (m, 2H); 1.59 (m, 2H); 1.36 (m, 2H). <sup>13</sup>C NMR (101 MHz, CDCl<sub>3</sub>) δ 202.5; 167.0; 138.3; 135.3; 128.7 (2C); 128.4; 128.3 (2C); 114.7; 67.2; 49.8; 42.8; 33.6; 28.2; 22.8.

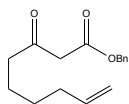

**Dec-9-ene-2,4-dione (2b)** <sup>1</sup>H-NMR (400 MHz, CDCl<sub>3</sub>) δ 5.73 (dd, *J* = 17.0, 10.3 Hz, 1H), 5.42 (s, 0.7H), 5.06 – 4.82 (m, 2H), 3.55 (s, 0.3H), 2.20 (dd, *J* = 15.1, 7.4 Hz, 2H), 2.10 (s, 3H), 2.06 – 1.91 (m, 1H), 1.69 – 1.43 (m, 3H), 1.36 (dt, *J* = 15.5, 7.6 Hz, 2H). <sup>13</sup>C NMR (101 MHz, CDCl<sub>3</sub>) δ 227.3, 191.4, 138.4, 114.7, 99.7, 38.0, 33.4, 28.4, 25.1, 24.9.

<sup>1</sup> Y, Zhang, J. Jiao, R. A. Flowers, *J. Org. Chem.* **2006**, *71*, 4516.

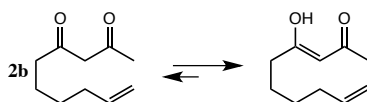

**1-Phenylnon-8-ene-1,3-dione (2c)**  $^1\text{H-NMR}$  (400 MHz,  $\text{CDCl}_3$ )  $\delta$  7.81 (m, 2H) 7.54 – 7.35 (m, 3H), 6.18 (s, 0.85H), 5.78-5.68 (m, 1H), 5.09 – 4.89 (m, 2H), 4.07 (s, 0.15H), 2.95 (t, 0.3H), 2.58 (t, 0.2H), 2.42 (t, 1.5H), 2.07-2.01 (m, 2H), 1.73 – 1.65 (m, 2H), 1.50-1.36 (m, 2H).  $^{13}\text{C-NMR}$  (101 MHz,  $\text{CDCl}_3$ )  $\delta$  196.8, 183.5, 138.4, 135.1, 132.22, 128.6, 128.5, 128.1, 127.1, 127.0, 114.8, 114.7, 96.1, 39.1, 33.5, 28.5, 25.3.

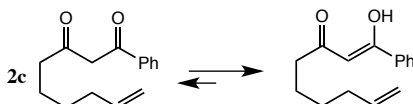

**1-(*p*-Tolyl)non-8-ene-1,3-dione (2d)**  $^1\text{H-NMR}$  (500 MHz,  $\text{CDCl}_3$ )  $\delta$  7.88 – 7.79 (m, 2H), 7.32 – 7.25 (m, 2H), 6.17 – 6.14 (m, 0.85H), 5.83 – 5.64 (m, 1H), 5.11 – 4.89 (m, 2H), 4.11 (s, 0.15H), 2.42 (s, 3H), 2.15 – 2.05 (m, 2H), 1.75 - 1.60 (s, 2H), 1.53 – 1.36 (m, 4H).  $^{13}\text{C-NMR}$  (126 MHz,  $\text{CDCl}_3$ )  $\delta$  196.0, 183.9, 142.9, 138.5, 138.4, 132.4, 129.31, 129.2, 128.2, 127.1, 127.0, 114.7, 114.7, 95.9, 95.7, 49.0, 38.9, 38.2, 33.8, 33.5, 32.4, 29.7, 28.5, 26.8, 26.6, 25.3, 22.5, 21.6, 13.9.

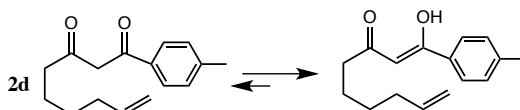

**1-(4-Methoxyphenyl)non-8-ene-1,3-dione (2e)**  $^1\text{H-NMR}$  (500 MHz,  $\text{CDCl}_3$ )  $\delta$  7.91 – 7.70 (m, 2H), 6.87 (d,  $J = 8.9$  Hz, 2H), 6.13 (s, 0.9H), 5.86 – 5.75 (m, 1H), 5.07– 4.92 (m, 2H), 4.04 (s, 0.1H), 3.88 (s, 3H), 2.45 – 2.38 (m, 2H), 2.15 – 2.02 (m, 2H), 1.75 – 1.42 (m, 4H).  $^{13}\text{C-NMR}$  (126 MHz,  $\text{CDCl}_3$ )  $\delta$  194.6, 184.3, 163.0, 138.4, 131.1, 130.3, 129.2, 129.1, 127.7, 114.7, 114.6, 114.0, 113.9, 113.6, 95.2, 55.4, 38.6, 33.5, 28.5, 25.4.

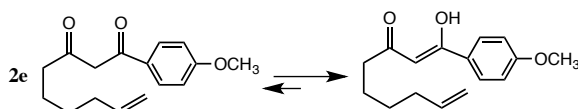

### Synthesis of ketoamide 2f

The named compound was prepared by aminolysis of ethylacetoacetate.<sup>2</sup> A mixture of ethyl acetoacetate (1 equiv., 1.3 mmol), amine **1f**<sup>3</sup> (1.2 equiv., 1.56 mmol), and 4-dimethylamino pyridine (0.5 equiv., 0.65 mmol), in toluene (20 mL) was refluxed until consumption of the ketoester (TLC). The solvent was evaporated under reduced pressure, and the residue was purified by flash chromatography (silicagel, hexane/EtOAc) giving **3f** in 75%.

***N*-benzyl-3-oxo-*N*-(pent-4-en-1-yl)butanamide (2f)**  $^1\text{H-NMR}$  (500 MHz,  $\text{CDCl}_3$ )  $\delta$  7.40-7.15 (m, 5H), 5.85-5.69 (m, 1H), 5.15-4.90 (m, 2H), 4.63 (s, 1H), 4.51 (s, 1H), 3.60 (s, 1H), 3.52 (s, 1H), 3.42-3.30 (m, 1H) 3.22-3.14 (m, 1H), 2.32 (s, 1.5H), 2.26 (s, 1.5H), 2.07-1.96 (m, 2H), 1.72-

<sup>2</sup> D. Yang, G. Y. Lian, H. F. Yang, J. D. Yu, D. W. Zhang, X. Gao, *J. Org. Chem.*, **2009**, 74, 8610

<sup>3</sup> C. Taillier, T. Hameury, V. Bellosta, J. Cossy. *Tetrahedron*, **2007**, 63 4472

1.59 (m, 2H). <sup>13</sup>C-NMR (126 MHz, CDCl<sub>3</sub>) δ 202.48, 175.25, 167.04, 166.71, 137.70, 137.1, 136.9, 136.4, 129.0, 128.6, 127.9, 127.8, 127.4, 126.2, 115.9, 115.1, 51.7, 50.1, 49.8, 48.2, 47.0, 46.1, 31.0, 30.6, 30.3, 27.4, 26.5.

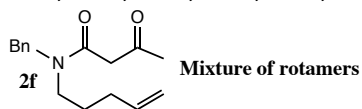

### Synthesis of enals 3a-f

These compounds were prepared by cross-metathesis as previously described.<sup>4</sup> To a solution of **2a-f** (2 mmol) and crotonaldehyde (2.5 mmol) in deoxygenated DCM (20 mL) was added Hoveyda-Grubbs catalyst (1 mol%) and heated until disappearance of starting compound (TLC). The solvent was eliminated under vacuum, and the residue was purified by flash chromatography (silicagel, hexane/EtOAc) giving enals in 85-95%.

**(E)-Benzyl 3,10-dioxodec-8-enoate (3a)**. Colorless oil; <sup>1</sup>H-NMR (500 MHz, CDCl<sub>3</sub>) δ 1.18 – 1.78 (m, 4H), 2.16 – 2.40 (m, 2H), 2.54 (t, *J* = 7.1 Hz, 2H), 3.48 (s, 2H), 5.17 (s, 2H), 5.88 – 6.18 (m, 1H), 6.79 (dt, *J* = 15.6, 6.7 Hz, 1H), 7.35 (m, 5H), 9.49 (d, *J* = 7.9 Hz, 1H), <sup>13</sup>C-NMR (126 MHz, CDCl<sub>3</sub>) δ 27.2, 22.9, 27.2, 32.5, 42.6, 49.4, 67.3, 128.3, 128.4, 128.5, 128.6, 128.7, 128.7, 133.3, 135.3, 158.0, 167.1, 194.1, 202.1; IR 3416, 2938, 2864, 2715, 1734, 1713, 1681, 1161; HRMS C<sub>17</sub>H<sub>21</sub>O<sub>4</sub> (M+H) Calc: 289.1434.; Found: 289.1437.

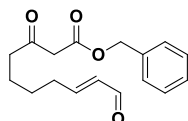

**(E)-8,10-Dioxo-10-phenyldec-2-enal (3c)** Colorless oil; <sup>1</sup>H-NMR (500 MHz, CDCl<sub>3</sub>) δ 1.47 – 1.68 (m, 2H), 1.67 – 1.81 (m, 2H), 1.90 (dd, *J* = 6.9, 1.7 Hz, 1H), 2.24 – 2.45 (m, 2H), 2.46 (dd, *J* = 24.5, 17.0 Hz, 2H), 5.98 – 6.27 (m, 2H), 6.84 (dt, *J* = 15.6, 6.8 Hz, 1H), 7.36 – 7.71 (m, 3H), 7.73 – 8.03 (m, 2H), 9.50 (d, *J* = 7.9 Hz, 1H); <sup>13</sup>C-NMR (126 MHz, CDCl<sub>3</sub>) δ 18.2, 22.9, 25.3, 27.3, 27.5, 32.6, 39.0, 43.0, 54.1, 96.3, 122.2, 127.1, 128.8, 128.9, 132.5, 133.3, 134.9, 147.4, 158.1, 183.4, 194.1, 196.5; IR 2944, 2986, 2721, 1691, 1601, 1453, 970; HRMS C<sub>16</sub>H<sub>19</sub>O<sub>3</sub> (M+H) Calc: 259.1329; Found: 259.1330.

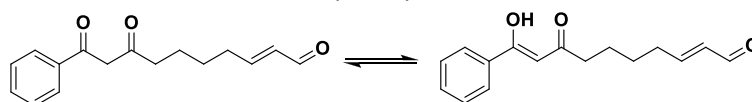

**(E)-8,10-Dioxoundec-2-enal (3b)** Colorless oil; <sup>1</sup>H-NMR (500 MHz, CDCl<sub>3</sub>) δ 1.41 – 1.72 (m, 5H), 1.91 (dt, *J* = 6.9, 1.8 Hz, 0.5H), 2.05 (d, *J* = 1.7 Hz, 2.5H), 2.14 – 2.44 (m, 4H), 3.57 (s, 0.2H), 5.48 (d, *J* = 1.2 Hz, 0.8H), 5.75 – 5.97 (m, 0.2H), 6.12 (ddd, *J* = 15.6, 7.9, 1.6 Hz, 0.8H), 6.83 (dt, *J* = 15.6, 6.7 Hz, 0.8H), 6.96 – 7.19 (m, 0.2H), 9.51 (dd, *J* = 7.9, 1.8 Hz, 1H); <sup>13</sup>C-NMR (126 MHz, CDCl<sub>3</sub>) δ 22.8, 25.0, 25.2, 27.5, 32.5, 32.6, 38.1, 100.0,

<sup>4</sup> (a) S. Fustero, D. Jimenez, J. Moscardo, S. Catalan, C. del Pozo, *Org. Lett.* **2007**, *9*, 5283 (b) E. C. Carlson, L. K. Rathbone, H. Yang, N. D. Collett, R. G. Carter, *J. Org. Chem.* **2008**, *73*, 5155

133.4, 158.0, 194.1; IR 3450, 2928, 2864, 1691, 1612, 975; HRMS C<sub>11</sub>H<sub>16</sub>O<sub>3</sub>Na (M+Na) Calc: 219.0992; Found: 219.0992.

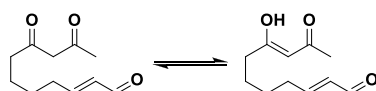

**(E)-8,10-Dioxo-10-p-tolyldec-2-enal (3d)** Colorless oil; <sup>1</sup>H-NMR (400 MHz, CDCl<sub>3</sub>) δ 1.69 (ddd, *J* = 51.3, 12.8, 7.9 Hz, 4H), 1.91 (ddd, *J* = 7.0, 1.7, 0.5 Hz, 2H), 2.42 (m, 4.7H), 2.89 (m, 0.3H), 5.85 (dd, *J* = 15.5, 1.7 Hz, 0.7H), 6.13 (m, 1.3H), 6.85 (m, 1H), 7.08 (dd, *J* = 15.5, 6.9 Hz, 1H), 7.25 (d, *J* = 8.5 Hz, 2H), 7.78 (m, 2H), 9.50 (d, *J* = 7.9 Hz, 1H); <sup>13</sup>C-NMR (101 MHz, CDCl<sub>3</sub>) δ 18.2, 21.7, 25.4, 26.8, 27.6, 32.6, 38.9, 95.9, 122.2, 127.2, 127.3, 128.3, 128.9, 129.3, 129.5, 129.7, 132.3, 133.4, 143.3, 147.4, 158.1, 183.9, 194.1, 195.7; IR 2938, 2859, 2715, 1686, 1606, 1442, 1182; HRMS C<sub>17</sub>H<sub>21</sub>O<sub>3</sub> (M+H) Calc: 273.1485; Found: 273.1487.

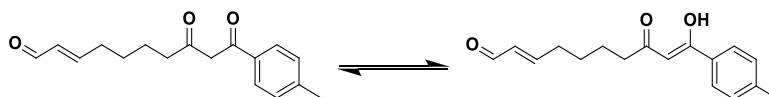

**(E)-10-(4-Methoxyphenyl)-8,10-dioxodec-2-enal (3e)** Colorless oil; <sup>1</sup>H-NMR (500 MHz, CDCl<sub>3</sub>) δ 1.60 (dd, *J* = 15.1, 7.9 Hz, 2H), 1.74 (m, 2H), 1.91 (dd, *J* = 6.9, 1.7 Hz, 1H), 2.41 (m, 4H), 3.86 (s, 2.6H), 4.03 (s, 0.4H), 6.12 (m, 2H), 6.83 (ddd, *J* = 18.7, 14.6, 9.4 Hz, 1H), 6.94 (dd, *J* = 8.8, 1.7 Hz, 2H), 7.86 (m, 2H), 9.50 (d, *J* = 7.9 Hz, 1H); <sup>13</sup>C-NMR (126 MHz, CDCl<sub>3</sub>) δ 18.2, 22.9, 25.5, 27.3, 27.6, 32.6, 38.5, 42.8, 54.1, 55.6, 55.7, 95.4, 114.1, 114.1, 122.1, 127.6, 129.2, 131.2, 133.3, 133.3, 147.3, 158.1, 163.3, 184.3, 194.1, 194.3; IR 2938, 2731, 1681, 1596, 1437; HRMS C<sub>17</sub>H<sub>21</sub>O<sub>4</sub> (M+H) Calc: 289.1434; Found: 289.1437.

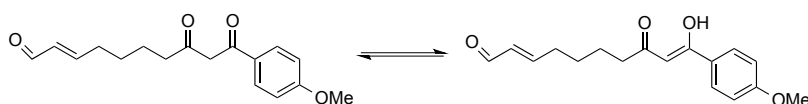

**(E)-N-Benzyl-3-oxo-N-(6-oxohex-4-enyl)butanamide (3f)** Colorless oil; <sup>1</sup>H-NMR Rotamer (500 MHz, CDCl<sub>3</sub>) δ 1.76 (dd, *J* = 15.7, 8.1 Hz, 2H), 1.95 (m, 1H), 2.31 (m, 4H), 3.33 (m, 2H), 3.58 (d, *J* = 26.5 Hz, 1.6H), 4.56 (d, *J* = 70.2 Hz, 2H), 5.10 (s, 0.4H), 6.10 (m, 1H), 6.80 (ddd, *J* = 50.7, 28.7, 11.2 Hz, 1H), 7.28 (m, 5H), 9.49 (d, *J* = 7.8 Hz, 1H); <sup>13</sup>C-NMR (126 MHz, CDCl<sub>3</sub>) δ 25.8, 26.8, 29.8, 30.1, 30.6, 45.8, 47.2, 48.5, 50.1, 52.0, 126.4, 127.8, 128.0, 128.1, 128.9, 129.2, 133.4, 133.8, 136.2, 155.8, 157.4, 167.4, 193.6, 194.0, 202.4; IR 3393, 2924, 2853, 2734, 1715, 1682, 1630; HRMS C<sub>17</sub>H<sub>22</sub>NO<sub>3</sub> (M+H) Calc: 288.1594; Found: 288.1601.

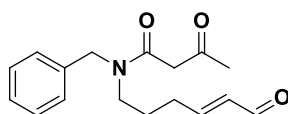

**(E)-7,9-dioxo-9-phenylnon-2-enal (6c).** Colorless oil.  $^1\text{H-NMR}$  (500 MHz,  $\text{CDCl}_3$ )  $\delta$  1.77 – 2.00 (m, 3H), 2.29 – 2.55 (m, 3H), 3.89 – 4.45 (m, 0.5H), 5.86 (dd,  $J = 15.6, 1.7$  Hz, 0.5H), 6.04 – 6.34 (m, 1.5H), 6.85 (dt,  $J = 15.6, 6.7$  Hz, 1H), 7.08 (dd,  $J = 15.5, 6.9$  Hz, 0.5H), 7.35 – 8.00 (m, 5H), 9.53 (d,  $J = 7.8$  Hz, 1H);  $^{13}\text{C-NMR}$  (126 MHz,  $\text{CDCl}_3$ )  $\delta$  18.6, 23.8, 32.1, 38.5, 96.4, 127.1, 128.8, 132.6, 133.7, 134.8, 147.4, 157.3, 183.4, 194.0, 195.9; IR 3358, 3055, 2938, 2730, 1675, 1596, 975; HRMS  $\text{C}_{15}\text{H}_{17}\text{O}_3$  (M+H) Calc: 245.1172.; Obs: 245.1172.

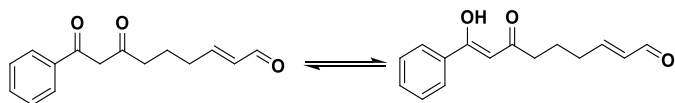

**(E)-9-(4-methoxyphenyl)-7,9-dioxonon-2-enal (6e).** Colorless oil.  $^1\text{H-NMR}$  (500 MHz,  $\text{CDCl}_3$ )  $\delta$  1.92 (m, 2H), 2.45 (dd,  $J = 15.3, 7.8$  Hz, 4H), 3.87 (m, 3.5H), 4.04 (s, 0.5H), 6.10 (s, 1H), 6.17 (d,  $J = 7.8$  Hz, 1H), 6.86 (m, 1H), 6.94 (d,  $J = 9.0$  Hz, 2H), 7.86 (d,  $J = 9.0$  Hz, 2H), 9.52 (d,  $J = 7.8$  Hz, 1H);  $^{13}\text{C-NMR}$  (126 MHz,  $\text{CDCl}_3$ )  $\delta$  24.0, 32.1, 38.0, 55.6, 95.5, 114.1, 114.2, 127.5, 129.3, 131.2, 133.6, 157.4, 163.3, 184.2, 193.7, 194.0; IR 2933.4, 2843.2, 2732, 1686.4, 1596, 1251.3, 1171.7; HRMS  $\text{C}_{16}\text{H}_{19}\text{O}_4$  (M+H) Calc: 275.1278; Obs: 275.1278.

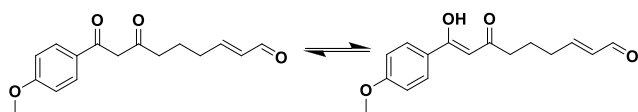

**(E)-N-benzyl-3-oxo-N-(5-oxopent-3-en-1-yl)butanamide (6f).** Colorless oil.  $^1\text{H-NMR}$  (500 MHz,  $\text{CDCl}_3$ )  $\delta$  2.32 (m, 3H), 2.58 (td,  $J = 7.6, 1.0$  Hz, 2H), 3.38 (dd,  $J = 16.7, 8.7$  Hz, 1.4H), 3.58 (m, 2.6H), 4.57 (d,  $J = 77.5$  Hz, 2H), 6.09 (m, 1H), 6.76 (ddd,  $J = 64.7, 35.9, 11.4$  Hz, 1H), 7.28 (m, 5H), 9.46 (dd,  $J = 9.2, 8.0$  Hz, 1H);  $^{13}\text{C-NMR}$  (126 MHz,  $\text{CDCl}_3$ )  $\delta$  27.0, 29.4, 30.5, 30.6, 31.1, 31.8, 44.9, 45.5, 46.2, 47.8, 48.6, 50.0, 50.1, 50.5, 52.3, 61.0, 126.5, 127.8, 127.9, 128.0, 128.1, 128.2, 128.9, 128.9, 129.1, 129.3, 134.4, 134.9, 135.9, 152.2, 154.4, 167.5, 193.2, 193.8, 200.0, 202.2; IR 3398, 2924, 2957.7, 2734, 1715, 1682, 1625; HRMS  $\text{C}_{16}\text{H}_{20}\text{NO}_3$  (M+H) Calc: 274.1438; Obs: 274.144.

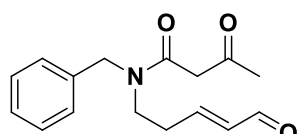

**General procedure for the intramolecular nitro-Michael reaction by using catalysts C.** A mixture of enal (0.8 mmol), p-nitrobenzoic acid (0.16 mmol, 20 mol%) and catalyst C (0.08 mmol, 10 mol%) in toluene (4 mL) was stirred at 0 °C for the time indicated in tables 2 and 3. After that time, the solvent was evaporated under vacuum, and the residue was purified by column chromatography to afford the cyclization products. The diastereomeric ratio was determined by  $^1\text{H}$  NMR spectroscopy of the purified product. The enantiomeric excess was determined by chiral-phase HPLC analysis using mixtures of hexane/isopropanol as eluent. The racemic mixtures were prepared in the same way, but using *rac*-C as catalyst.

**(7S)-Benzyl 2-oxo-7-(2-oxoethyl) cycloheptanecarboxylate (4a)** Colorless oil;  $[\alpha]_{\text{D}}^{20} = -21.7$  ( $c = 0.9$ ,  $\text{CHCl}_3$  93% ee).  $^1\text{H-NMR}$  (500 MHz,  $\text{CDCl}_3$ )  $\delta$  1.39 – 2.04 (m, 7H), 2.24 – 2.94 (m, 4H), 3.38 (dd,  $J = 9.9, 1.6$  Hz, 0.5H), 3.84 (s, 0.5H), 5.16 (d,  $J = 7.3$  Hz, 2H), 7.26

– 7.50 (m, 5H), 9.70 (d,  $J = 9.5$  Hz, 1H),  $^{13}\text{C-NMR}$  (101 MHz,  $\text{CDCl}_3$ )  $\delta$  23.6, 27.9, 31.1, 38.9, 43.6, 45.8, 48.9, 61.3, 128.3, 128.7, 135.4, 169.1, 169.6, 177.1, 200.7, 207.2, 207.8; **IR** 3474, 2928, 2864, 2721, 1734, 1702, 1453, 1171; **HPLC** (Chiralpack AD-H hexane/*i*PrOH 97:3; 0.7 mL/min,  $\lambda = 220$  nm)  $t_{\text{R}} = 48.4$  min (minor);  $t_{\text{R}} = 50.2$  min (major); **HRMS**  $\text{C}_{17}\text{H}_{21}\text{O}_4$  (M+H) Calc: 289.1434.; Found: 289.1431.

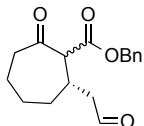

**2-((1S,2R)-2-Acetyl-3-oxocycloheptyl)acetaldehyde (4b)** Colorless oil;  $[\alpha]_{\text{D}}^{20} = +9.4$  ( $c = 1.2$ ,  $\text{CHCl}_3$  88% ee).  $^1\text{H-NMR}$  (500 MHz,  $\text{CDCl}_3$ )  $\delta$  1.17 – 1.99 (m, 7H), 2.00–2.30 (m, 3H), 2.36 – 2.43 (m, 0.5H), 2.41 – 2.54 (m, 0.5H), 2.56 – 2.95 (m, 3H), 3.44 (ddd,  $J = 12.9, 7.5, 2.9$  Hz, 0.5H), 3.63 (d,  $J = 10.3$  Hz, 0.5H), 9.76 (dd,  $J = 24.9, 23.3$  Hz, 1H);  $^{13}\text{C-NMR}$  (126 MHz,  $\text{CDCl}_3$ )  $\delta$  20.4, 23.9, 24.7, 25.2, 25.7, 26.6, 28.9, 30.0, 30.6, 32.1, 32.4, 33.3, 36.5, 37.5, 40.3, 41.6, 45.0, 46.7, 49.4, 123.8, 200.9, 201.1; **IR** 3398, 2922.8, 2853, 2700, 1691.7, 1654, 1553; **HPLC** (Chiralcel OJ-H hexane/*i*PrOH 95:5; 1 mL/min,  $\lambda = 254$  nm)  $t_{\text{R}} = 16.5$  min (major);  $t_{\text{R}} = 18.9$  min (minor); **HRMS**  $\text{C}_{11}\text{H}_{17}\text{O}_3$  (M+H) Calc: 197.1172; Found: 197.1174.

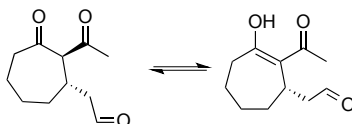

**2-((1S,2S)-2-Benzoyl-3-oxocycloheptyl)acetaldehyde (4c)** Colorless oil;  $[\alpha]_{\text{D}}^{20} = +9.0$  ( $c = 0.7$ ,  $\text{CHCl}_3$  90% ee).  $^1\text{H-NMR}$  (500 MHz,  $\text{CDCl}_3$ )  $\delta$  1.65 – 2.14 (m, 5H), 1.41 – 1.58 (m, 1H), 2.28 (ddd,  $J = 17.4, 10.0, 2.4$  Hz, 1H), 2.44 (ddd,  $J = 17.7, 11.1, 4.7$  Hz, 1H), 2.83 (dd,  $J = 17.6, 4.0$  Hz, 2H), 2.98 – 3.17 (m, 1H), 4.84 (d,  $J = 2.4$  Hz, 1H), 7.35 – 7.61 (m, 3H), 7.78 (dd,  $J = 8.3, 1.1$  Hz, 2H), 9.77 (t, 1H);  $^{13}\text{C-NMR}$  (126 MHz,  $\text{CDCl}_3$ )  $\delta$  23.8, 24.9, 30.3, 33.8, 44.0, 44.9, 61.8, 127.2, 128.1, 128.6, 128.9, 133.4, 136.9, 196.8, 201.2, 209.6; **IR** 2933, 2864, 2726, 1690, 1681, 1447, 1214; **HPLC** (Chiralcel OJ-H hexane/*i*PrOH 50:50; 1 mL/min,  $\lambda = 254$  nm)  $t_{\text{R}} = 13.8$  min (major);  $t_{\text{R}} = 16.9$  min (minor); **HRMS**  $\text{C}_{16}\text{H}_{18}\text{O}_3\text{Na}$  (M+Na) Calc: 281.1148; Found: 281.1150.

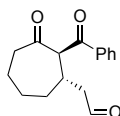

**2-((1S,2S)-2-(4-Methylbenzoyl)-3-oxocycloheptyl)acetaldehyde (4d)** Colorless oil;  $[\alpha]_{\text{D}}^{20} = +23.5$  ( $c = 1$ ,  $\text{CHCl}_3$  93% ee).  $^1\text{H-NMR}$  (500 MHz,  $\text{CDCl}_3$ )  $\delta$  1.50 (d,  $J = 12.4$  Hz, 1H), 1.72 (d,  $J = 14.1$  Hz, 1H), 1.92 (m, 4H), 2.27 (dd,  $J = 17.3, 10.0$  Hz, 1H), 2.42 (m, 4H), 2.83 (d,  $J = 17.5$  Hz, 2H), 3.06 (s, 1H), 4.80 (s, 1H), 7.23 (d,  $J = 7.7$  Hz, 2H), 7.67 (d,  $J = 8.0$  Hz, 2H), 9.76 (s, 1H);  $^{13}\text{C-NMR}$  (126 MHz,  $\text{CDCl}_3$ )  $\delta$  21.7, 23.8, 24.9, 30.4, 33.8, 44.0, 45.0, 61.8, 128.2, 129.6, 2C(134.5), 2C(144.3), 196.4, 201.3, 209.6; **IR** 2928, 2726, 1675, 1601, 1187, 731; **HPLC** (Chiralcel OJ-H hexane/*i*PrOH 70:30; 1 mL/min,  $\lambda = 254$  nm)  $t_{\text{R}} = 28.9$  min (major);  $t_{\text{R}} = 32.5$  min (minor); **HRMS**  $\text{C}_{17}\text{H}_{21}\text{O}_3$  (M+H) Calc: 273.1485; Found: 273.1488.

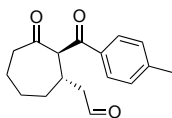

**2-((1S,2S)-2-(4-Methoxybenzoyl)-3-oxocycloheptyl)acetaldehyde (4e)** Colorless oil;  $[\alpha]_D^{20} = +10.9$  ( $c = 1$ ,  $\text{CHCl}_3$  84% ee).  $^1\text{H-NMR}$  (500 MHz,  $\text{CDCl}_3$ )  $\delta$  1.53 (d,  $J = 13.2$  Hz, 1H), 1.73 (m, 1H), 1.93 (m, 4H), 2.29 (ddd,  $J = 17.4, 9.8, 2.2$  Hz, 1H), 2.46 (ddd,  $J = 17.4, 10.8, 4.7$  Hz, 1H), 2.84 (m, 2H), 3.06 (m, 1H), 3.86 (m, 3H), 4.78 (d,  $J = 2.3$  Hz, 1H), 6.92 (dd,  $J = 8.6, 1.5$  Hz, 2H), 7.77 (m, 2H), 9.76 (d,  $J = 2.2$  Hz, 1H);  $^{13}\text{C-NMR}$  (126 MHz,  $\text{CDCl}_3$ )  $\delta$  23.8, 25.0, 30.6, 33.8, 44.0, 45.2, 55.6, 61.6, 2C(114.1), 2C(130.4), 2C(163.8), 195.2, 201.3, 209.7; **IR** 2933.4, 2853, 2730, 2254, 1702, 1601, 1166; **HPLC** (Chiralcel OJ-H hexane/iPrOH 50:50; 1 mL/min,  $\lambda = 254$  nm)  $t_R = 24.6$  min (major);  $t_R = 30.1$  min (minor); **HRMS**  $\text{C}_{17}\text{H}_{21}\text{O}_4$  (M+H) Calc: 289.1434; Found: 289.1437.

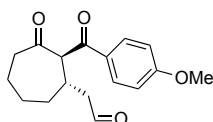

**2-((3R,4S)-3-Acetyl-1-benzyl-2-oxoazepan-4-yl)acetaldehyde (4f)** Colorless oil;  $[\alpha]_D^{20} = +12.1$  ( $c = 1$ ,  $\text{CHCl}_3$  92% ee).  $^1\text{H-NMR}$  (500 MHz,  $\text{CDCl}_3$ )  $\delta$  1.34 (d,  $J = 14.3$  Hz, 1H), 1.57 (m, 2H), 1.91 (dd,  $J = 14.4, 3.8$  Hz, 1H), 2.25 (m, 4H), 2.78 (dd,  $J = 17.1, 2.8$  Hz, 1H), 2.94 (dd,  $J = 10.2, 3.4$  Hz, 1H), 3.27 (dd,  $J = 15.5, 5.4$  Hz, 1H), 3.46 (dd,  $J = 15.4, 11.3$  Hz, 1H), 3.83 (s, 1H), 4.61 (dd,  $J = 34.8, 14.4$  Hz, 2H), 7.31 (m, 5H), 9.72 (d,  $J = 2.8$  Hz, 1H);  $^{13}\text{C-NMR}$  (126 MHz,  $\text{CDCl}_3$ )  $\delta$  23.1, 26.9, 30.2, 32.3, 43.2, 48.8, 51.2, 60.2, 123.6, 128.0, 128.5, 128.9, 131.3, 137.2, 170.8, 201.5, 203.5; **IR** 2922.8, 2853.8, 2249, 1718, 1628, 725; **HPLC** (Chiralcel OJ-H hexane/iPrOH 70:30; 1 mL/min,  $\lambda = 220$  nm)  $t_R = 17.7$  min (minor);  $t_R = 19.5$  min (major); **HRMS**  $\text{C}_{17}\text{H}_{22}\text{NO}_3$  (M+H) Calc: 288.1594; Found: 288.1598.

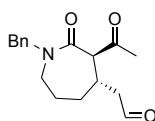

**2-((1S,2S)-2-benzoyl-3-oxocyclohexyl)acetaldehyde (7c)**. Colorless oil.  $[\alpha]_D^{20} = -32.9$  ( $c = 0.8$ ,  $\text{CHCl}_3$  78% ee).  $^1\text{H-NMR}$  (400 MHz,  $\text{CDCl}_3$ )  $\delta$  1.67 (ddd,  $J = 17.7, 10.4, 5.5$  Hz, 1H), 1.85 (dddd,  $J = 11.2, 8.7, 6.3, 4.3$  Hz, 1H), 2.10 (dddd,  $J = 17.0, 10.7, 8.9, 5.2$  Hz, 2H), 2.29 – 2.66 (m, 4H), 2.90 – 3.11 (m, 1H), 4.39 (dd,  $J = 9.7, 0.8$  Hz, 1H), 7.34 – 7.67 (m, 3H), 7.88 (dd,  $J = 8.3, 1.1$  Hz, 2H), 9.71 (dd,  $J = 1.8, 1.3$  Hz, 1H),  $^{13}\text{C-NMR}$  (101 MHz,  $\text{CDCl}_3$ )  $\delta$  24.7, 29.6, 35.6, 41.9, 48.2, 62.9, 128.5, 128.7, 128.9, 133.6, 2C(137.3), 197.5, 200.7, 207.6; **IR** 3421, 2928, 2859, 2715, 1680, 1675, 1240  $\text{cm}^{-1}$ ; **HPLC** (Chiralpak AS-H hexane/iPrOH 80:20; 1 mL/min,  $\lambda = 254$  nm)  $t_R = 22.9$  min (minor);  $t_R = 32.0$  min (major); **HRMS**  $\text{C}_{15}\text{H}_{17}\text{O}_3$  (M+H) Calc: 245.1172.; Obs: 245.1173.

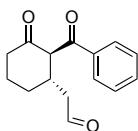



**2-((1S,2S)-2-(4-methoxybenzoyl)-3-oxocyclohexyl)acetaldehyde (7e).** Colorless oil.  $[\alpha]_D^{20} = -27.1$  ( $c = 0.8$ ,  $\text{CHCl}_3$  89% ee).  $^1\text{H-NMR}$  (500 MHz,  $\text{CDCl}_3$ )  $\delta$  1.64 (dd,  $J = 13.7$ , 3.3 Hz, 1H), 1.85 (m, 1H), 2.09 (m, 2H), 2.49 (m, 4H), 3.02 (m, 1H), 3.85 (s, 3H), 4.31 (d,  $J = 9.4$  Hz, 1H), 6.92 (d,  $J = 8.8$  Hz, 2H), 7.87 (d,  $J = 8.8$  Hz, 2H), 9.70 (d,  $J = 0.7$  Hz, 1H);  $^{13}\text{C-NMR}$  (126 MHz,  $\text{CDCl}_3$ )  $\delta$  24.6, 29.4, 35.6, 41.7, 48.2, 55.6, 62.6, 114.0, 130.4, 2C(131.0), 2C(164.0), 195.6, 200.8, 207.7; IR 2922.8, 2853.8, 2715, 1697, 1665, 1601, 1251, 1023  $\text{cm}^{-1}$ ; HPLC (Chiralcel OJ-H hexane/iPrOH 50:50; 1 mL/min,  $\lambda = 254$  nm)  $t_R=26.5$  min (major);  $t_R=34.5$  min (minor); HRMS  $\text{C}_{16}\text{H}_{19}\text{O}_4$  (M+H) Calc: 275.1278; Obs: 275.1278.

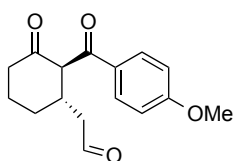

**2-((3R,4S)-3-acetyl-1-benzyl-2-oxopiperidin-4-yl)acetaldehyde (7f).** Colorless oil.  $[\alpha]_D^{20} = -14.0$  ( $c = 1$ ,  $\text{CHCl}_3$  64% ee)  $^1\text{H-NMR}$  (500 MHz,  $\text{CDCl}_3$ )  $\delta$  1.53 (ddd,  $J = 10.1$ , 5.3, 3.6 Hz, 1H), 2.02 (m, 1H), 2.46 (m, 5H), 2.85 (m, 1H), 3.20 (dt,  $J = 12.5$ , 4.9 Hz, 1H), 3.31 (m, 1H), 3.37 (d,  $J = 8.8$  Hz, 1H), 4.55 (dd,  $J = 39.7$ , 10.8 Hz, 2H), 7.28 (m, 5H), 9.74 (m, 1H);  $^{13}\text{C-NMR}$  (126 MHz,  $\text{CDCl}_3$ )  $\delta$  18.5, 25.8, 27.0, 27.8, 29.4, 29.8, 31.0, 42.6, 45.5, 47.2, 47.8, 50.0, 50.5, 61.0, 127.7, 127.8, 127.9, 128.0, 128.1, 128.2, 128.6, 128.9, 128.9, 136.6, 165.8, 200.0, 201.1, 205.3; IR 3394, 2928, 2858, 2728, 1716, 1631  $\text{cm}^{-1}$ ; HPLC (Chiralcel OJ-H hexane/iPrOH 70:30; 1 mL/min,  $\lambda = 220$  nm)  $t_R=40.7$  min (minor);  $t_R=44.0$  min (major); HRMS  $\text{C}_{16}\text{H}_{20}\text{NO}_3$  (M+H) Calc: 274.1438; Obs: 274.1441.

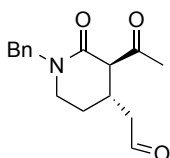

Chemical correlation of **7c** with **10**.

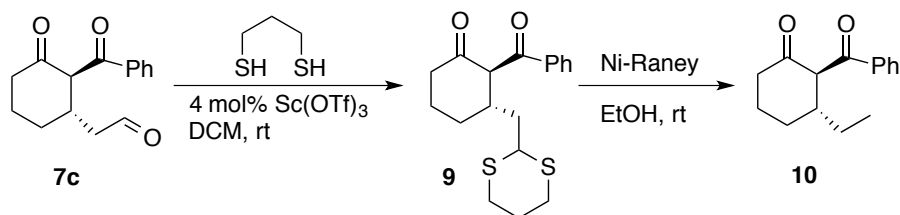

The chemoselective thioacetalization was done as previously described.<sup>5</sup> A mixture of 0.16 mmol of **7c** (78% ee), 0.20 mmol of 1,3-propanedithiol and scandium triflate (4 mol%) in 5 mL of DCM was stirred at rt for 4 h. The solvent was eliminated under vacuum, and the residue was purified by flash chromatography (silicagel, hexane/EtOAc: 4/1, v/v) giving **9** (85%) as colorless oil.  $^1\text{H-NMR}$  (500 MHz,  $\text{CDCl}_3$ )  $\delta$ : 1.55(m,

<sup>5</sup> A. Kamal, G. Chouhan, *Tetrahedron Lett.* **2002**, 43 1347.

1H), 1.70 (m, 1H), 1.85 (m, 3H), 2.07 (m, 2H), 2.4 (m, 1H), 2.44 (m, 1H), 2.57 (m, 1H), 2.81 (m, 5H), 4.07 (dd,  $J_1 = 9$  Hz,  $J_2 = 6$  Hz, 1H), 4.20 (d,  $J = 10$  Hz, 1H), 7.46 (m, 2H), 7.57 (m, 1H), 7.90 (m, 1H).

To a solution of **9** in 5 mL of ethanol was added 200 mg of Ni-Raney and the mixture was stirred at rt for 4 h. The mixture was filtered, the solid washed with ethanol (4 x 5 mL), and the filtrate was concentrated under reduced pressure. The residue was purified by flash chromatography (silicagel, hexane/EtOAc: 2/1, v/v) giving to **10** in 50%. The absolute stereochemistry was established by both the sign of the optical rotation and the elution order of the enantiomers in HPLC.

**(2S,3R)-2-Benzoyl-3-ethylcyclohexanone (10)**. Colorless solid;  $[\alpha]_D^{20} = + 6.6$  ( $c = 1$ ,  $\text{CHCl}_3$  76% ee), lit.<sup>6</sup>  $[\alpha]_D^{24} = - 1.6$  ( $c = 2.4$ ,  $\text{CHCl}_3$  18% ee) for *ent*-**10**. **<sup>1</sup>H-NMR** (500 MHz,  $\text{CDCl}_3$ )  $\delta$  0.91 (t,  $J = 7.4$  Hz, 3H), 1.29 (dd,  $J = 13.4, 5.1$  Hz, 1H), 1.44 (m, 2H), 1.82 (m, 1H), 2.08 (m, 2H), 2.48 (m, 3H), 4.18 (dd,  $J = 9.0, 0.9$  Hz, 1H), 7.50 (m, 3H), 7.88 (dd,  $J = 8.3, 1.2$  Hz, 2H); **HPLC** (Chiralcel OJ-H hexane/*i*PrOH 97:3; 1 mL/min,  $\lambda = 220$  nm)  $t_R = 19.4$  min (major);  $t_R = 29.4$  min (minor) (76% ee), lit.<sup>6a</sup>  $t_R = 25.5$  min for enantiomer (2S, 3R) and  $t_R = 35.5$  min for enantiomer (2R, 3S) in the same HPLC conditions .

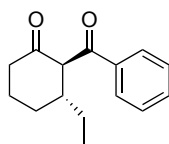

<sup>6</sup> (a)X. Tang, A. J. Blake, W. Lewis, S. Woodward, *Tetrahedron: Asymmetry* **2009**, *20*, 1881; (b) K. Agapiou, D. F. Cauble, M. J. Krische, *J. Am. Chem. Soc.* **2004**, *126*, 4528.

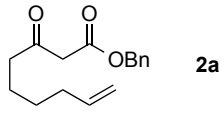

1786\_PROTON\_01

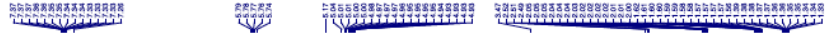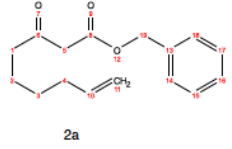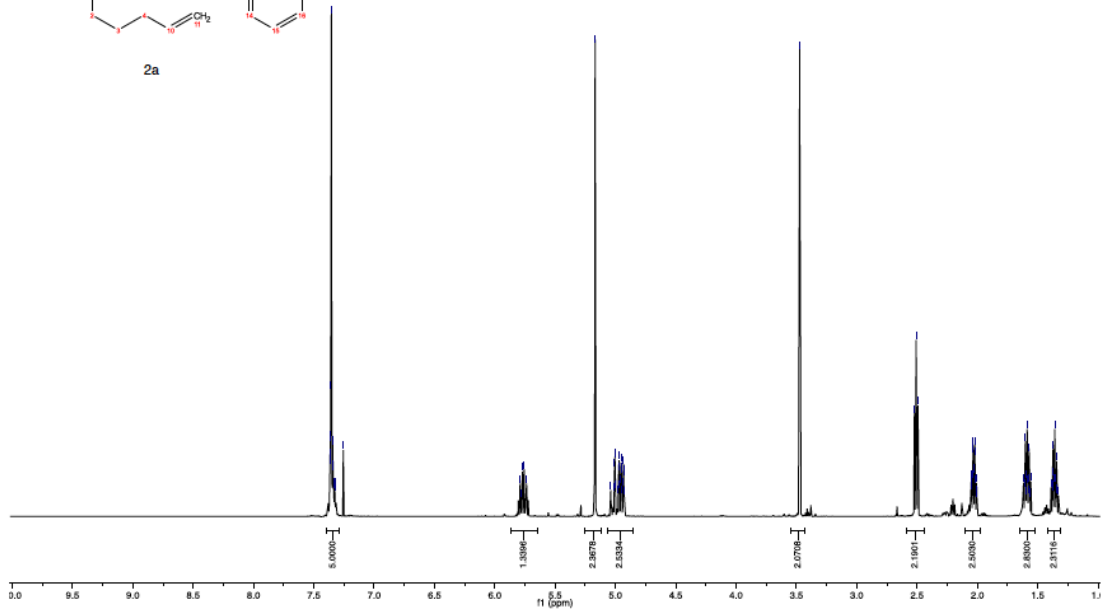

1786C\_CARBON\_01

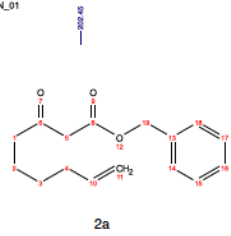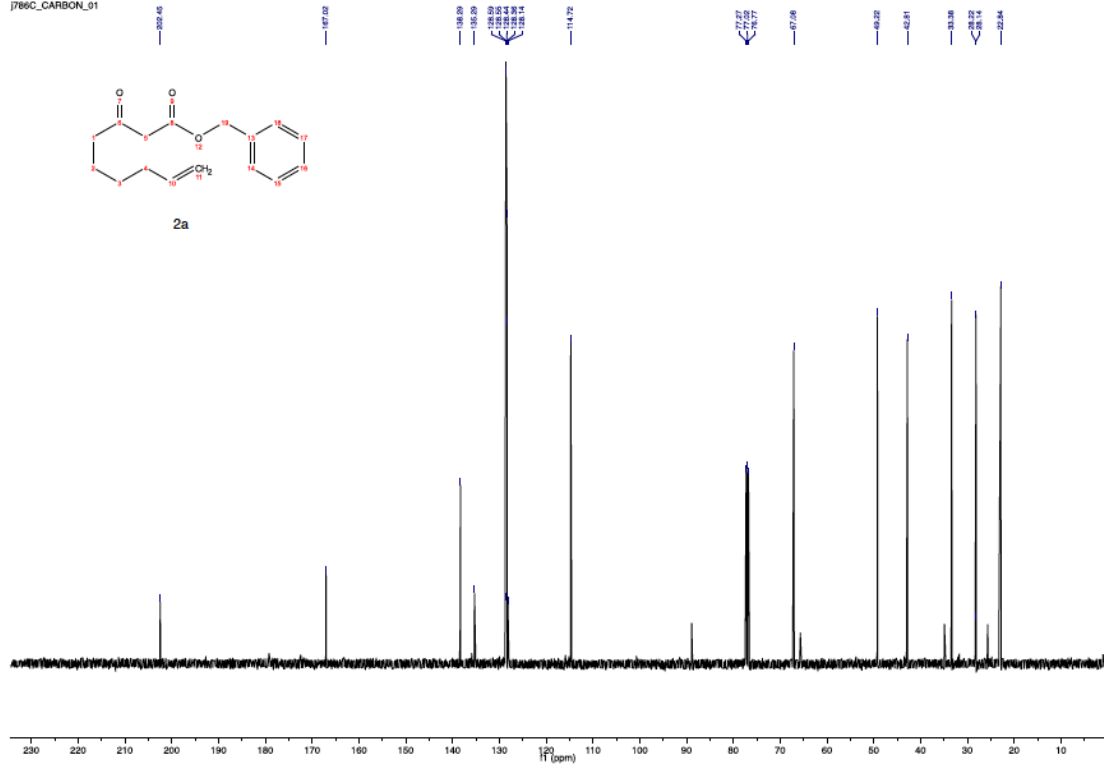

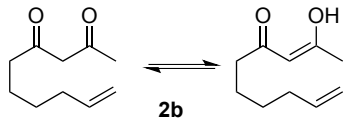

p40\_PROTON\_01  
p40

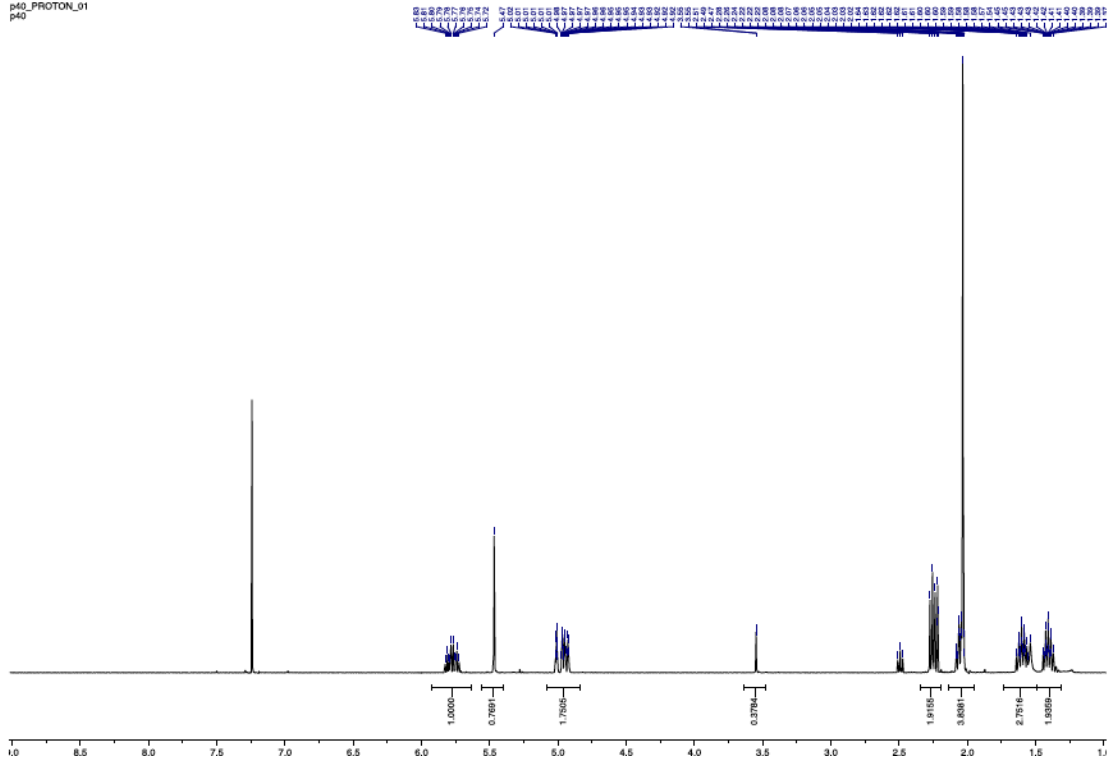

p40\_CARBON\_01  
p40

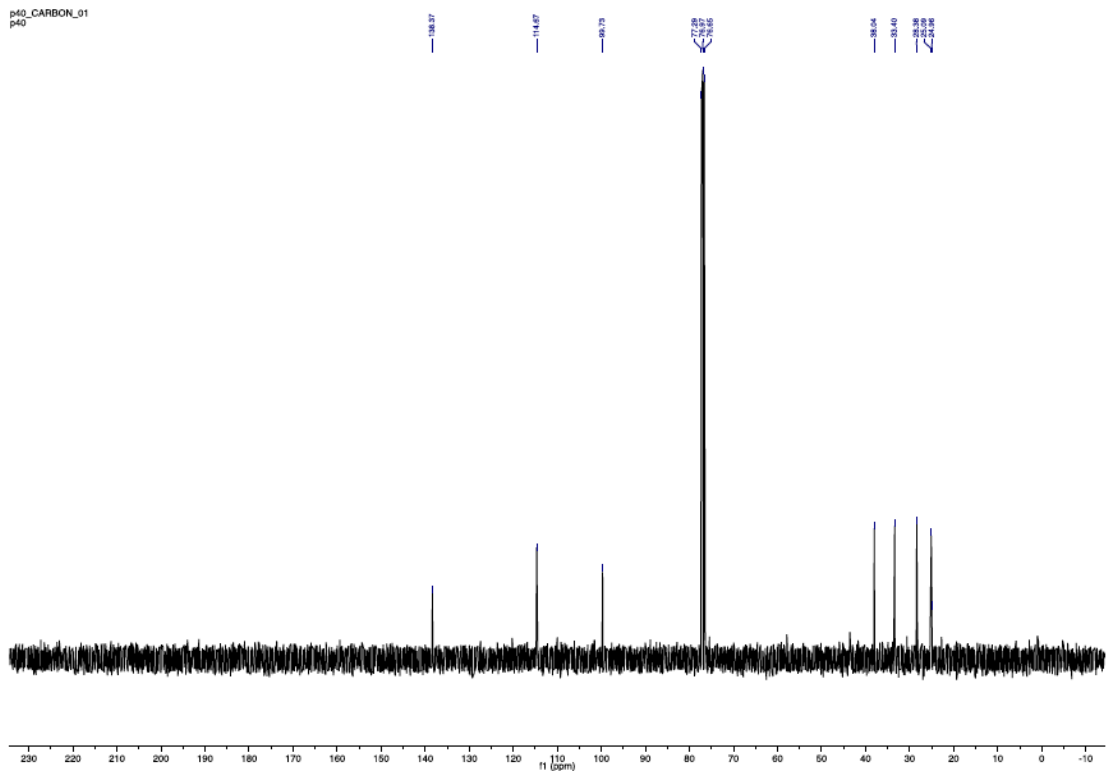



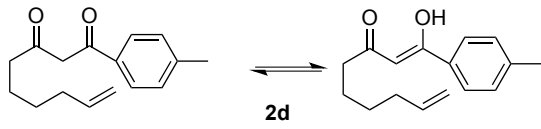

p41\_PROTON\_01

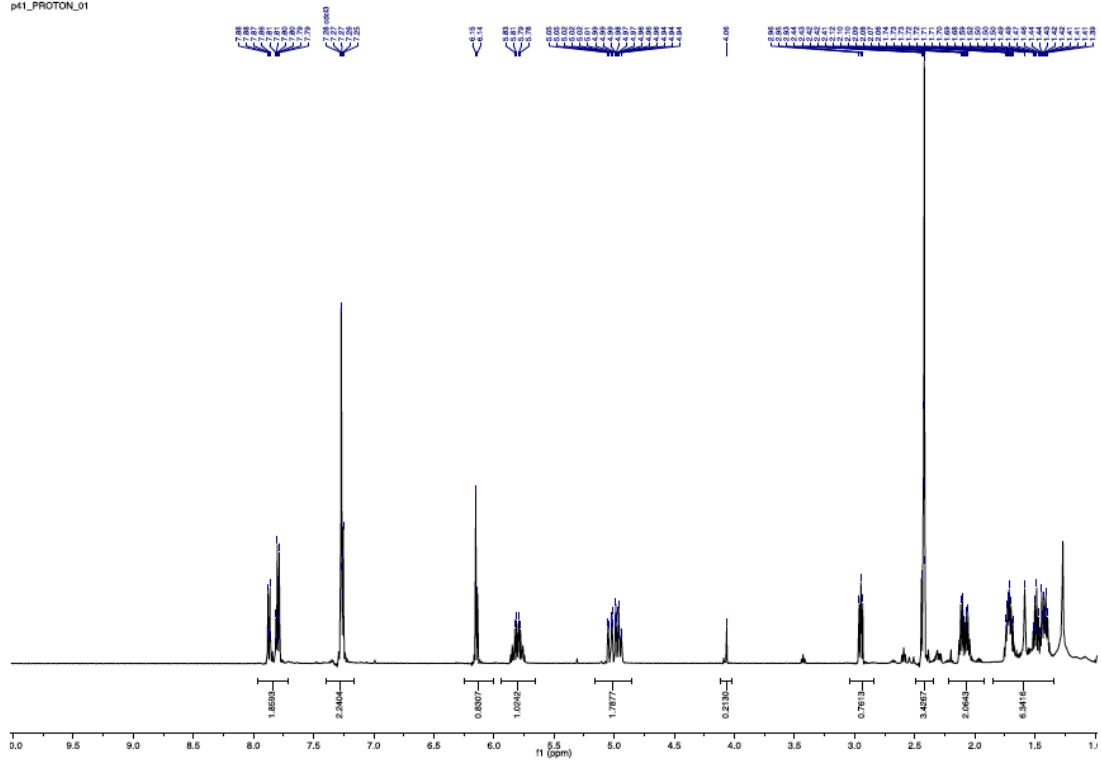

p41\_CARBON\_01

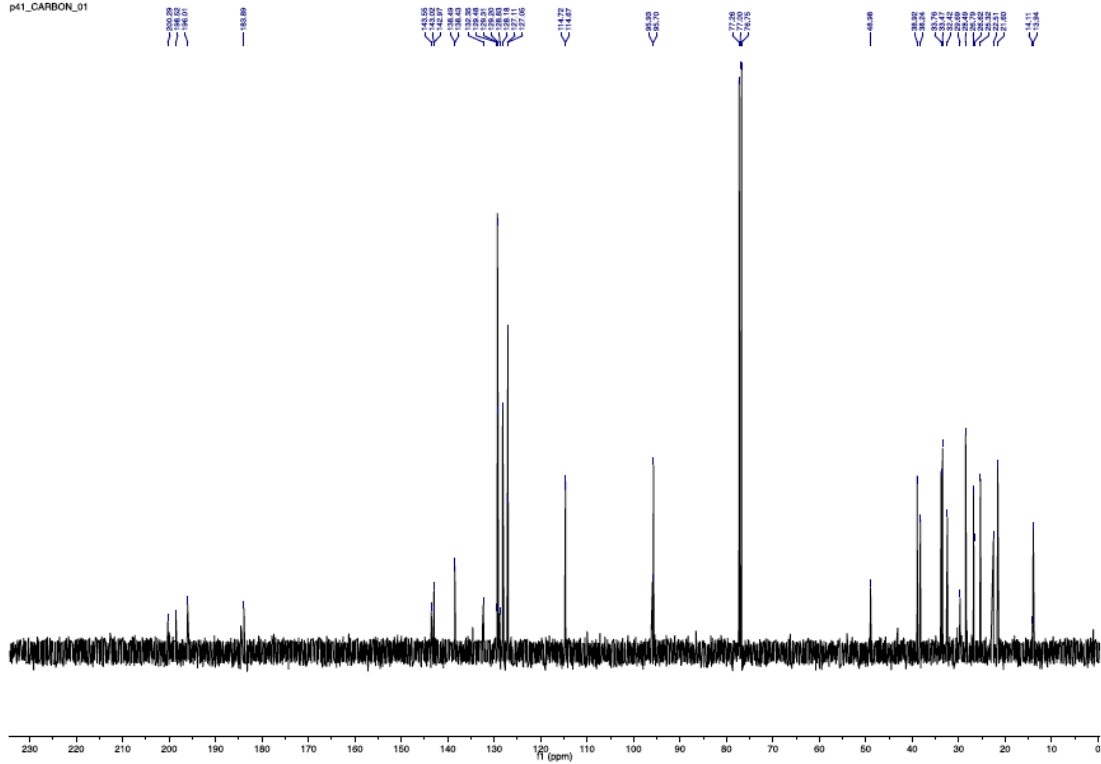



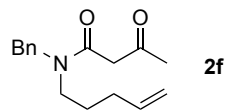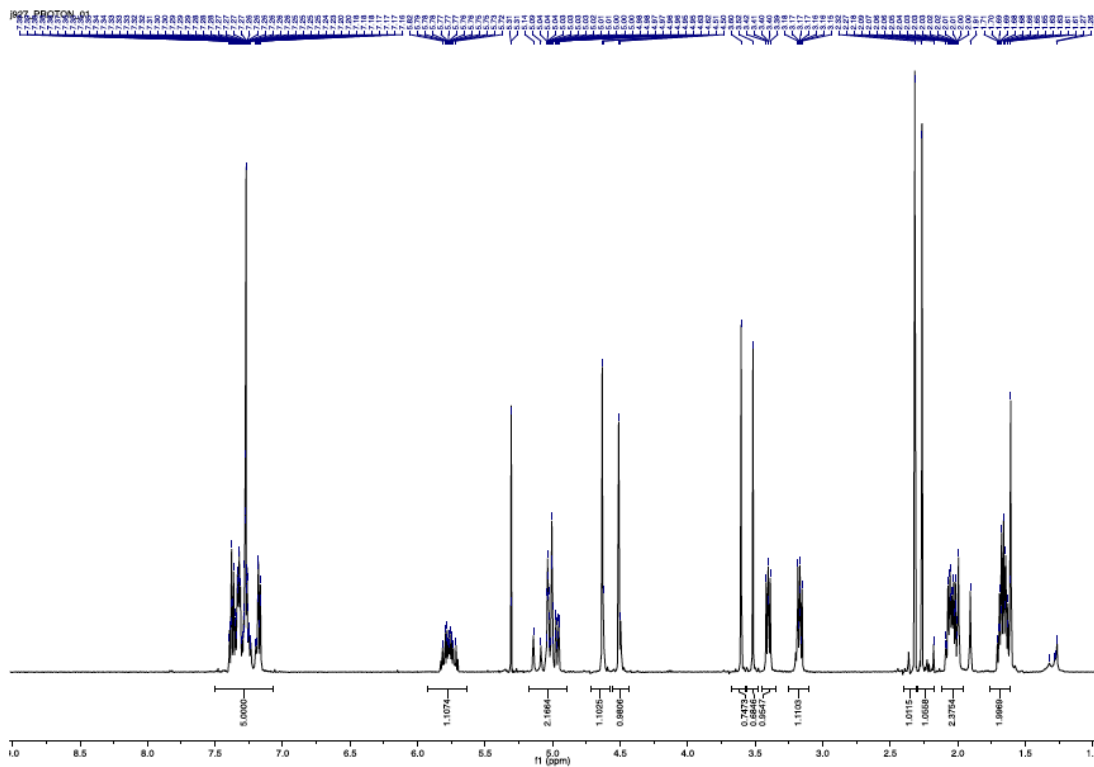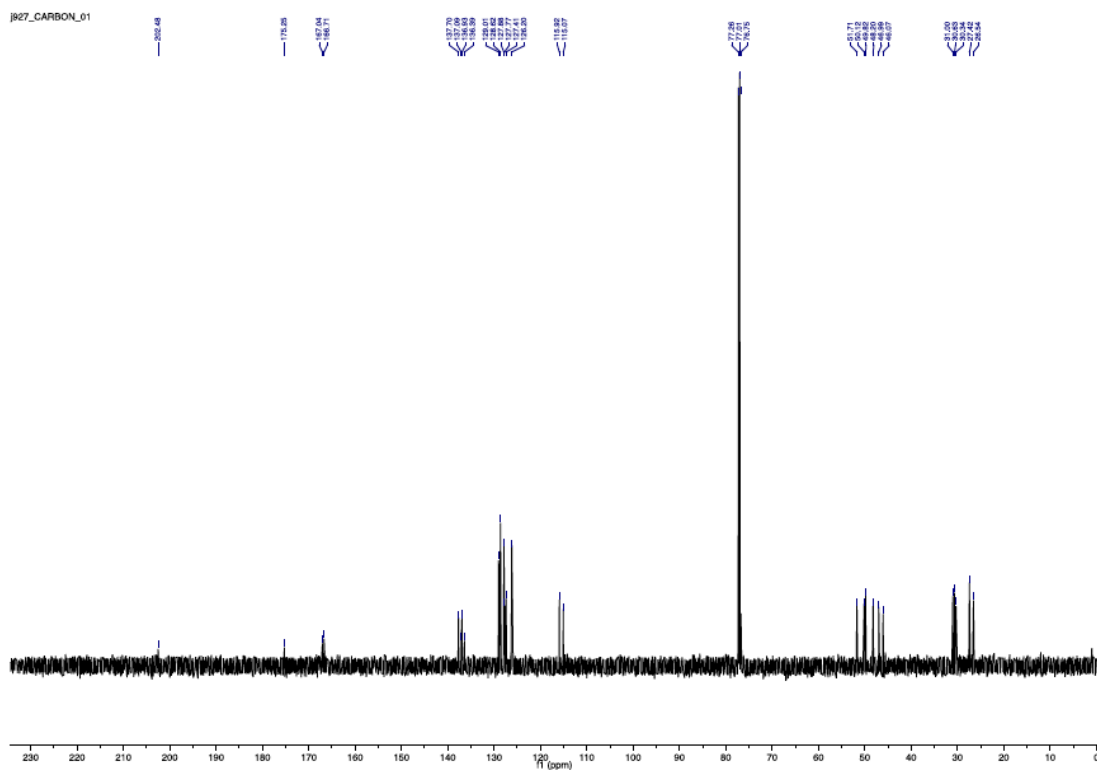



3a

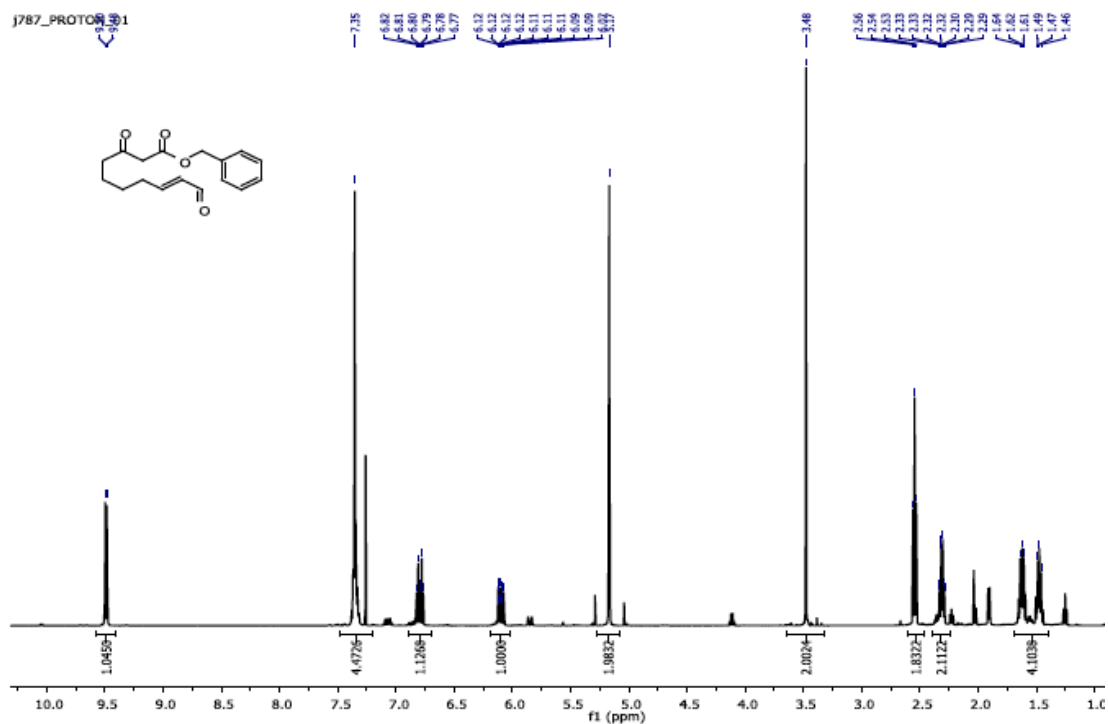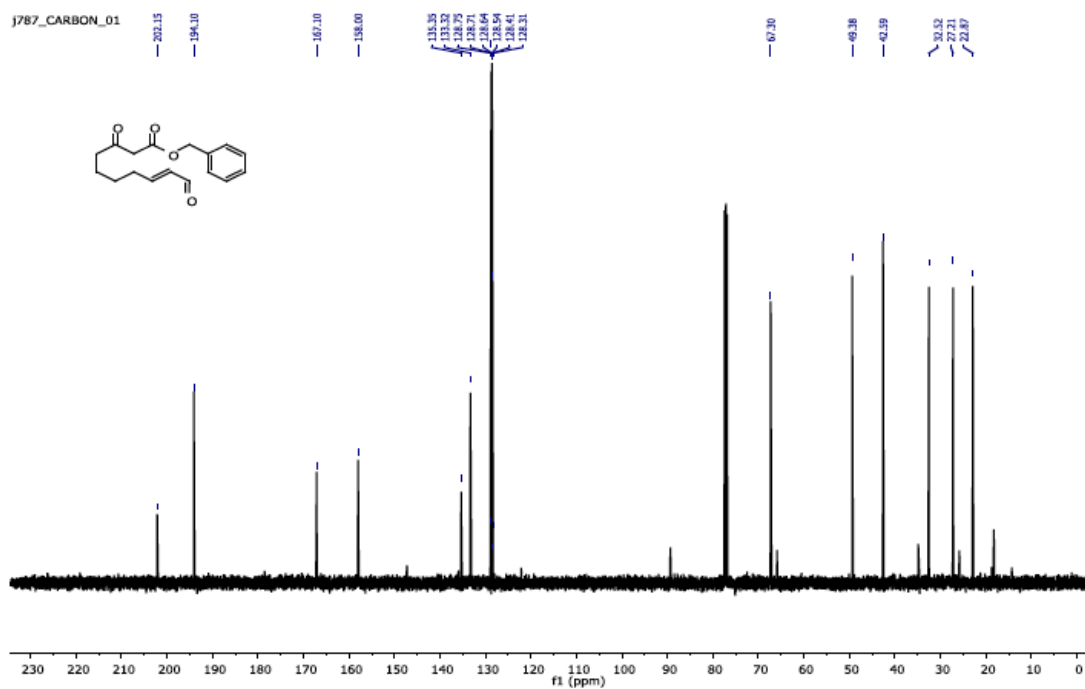

3b

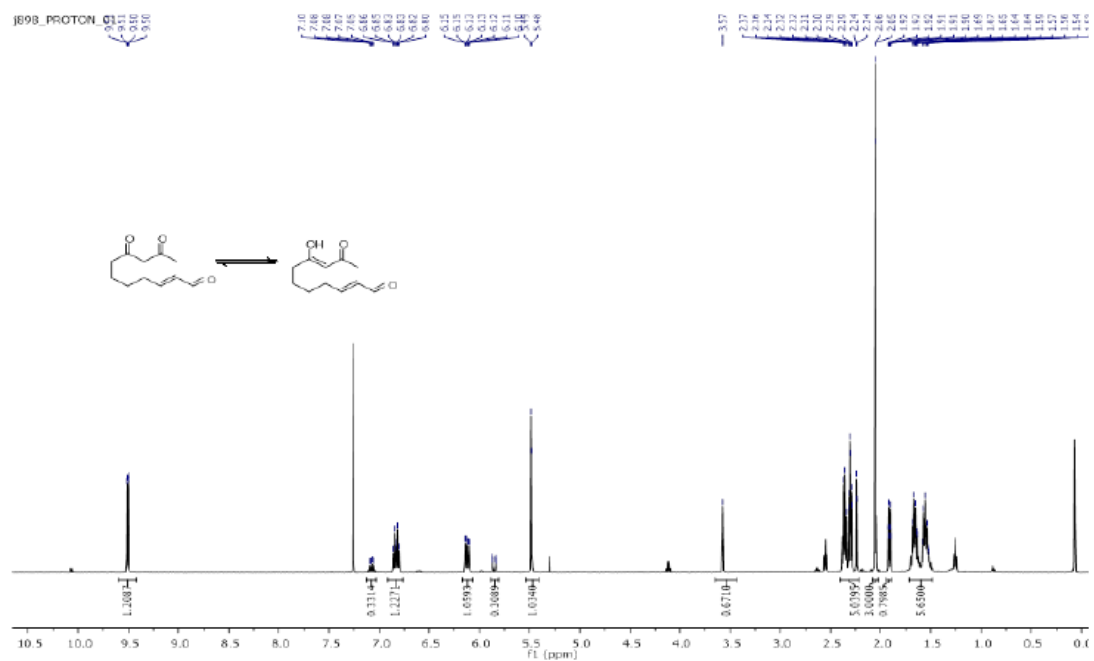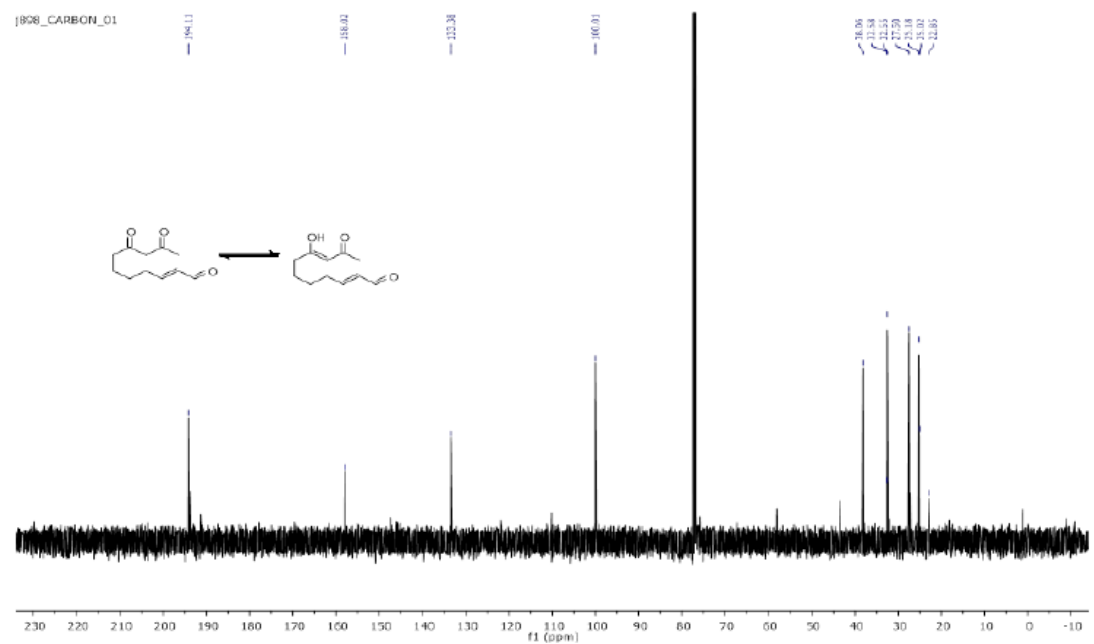



# 3d

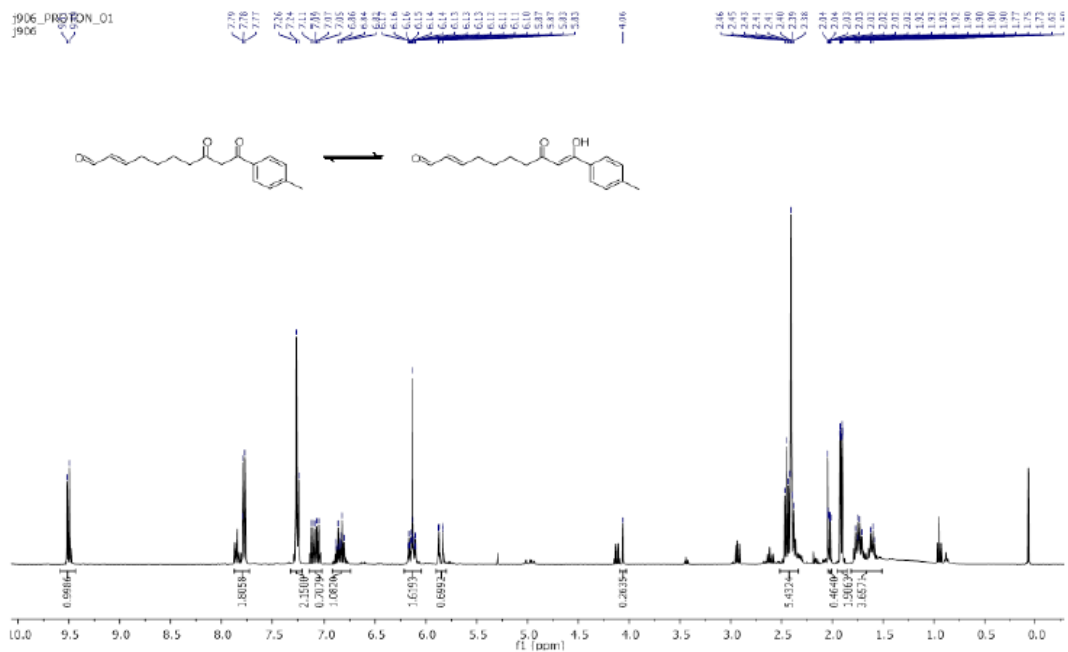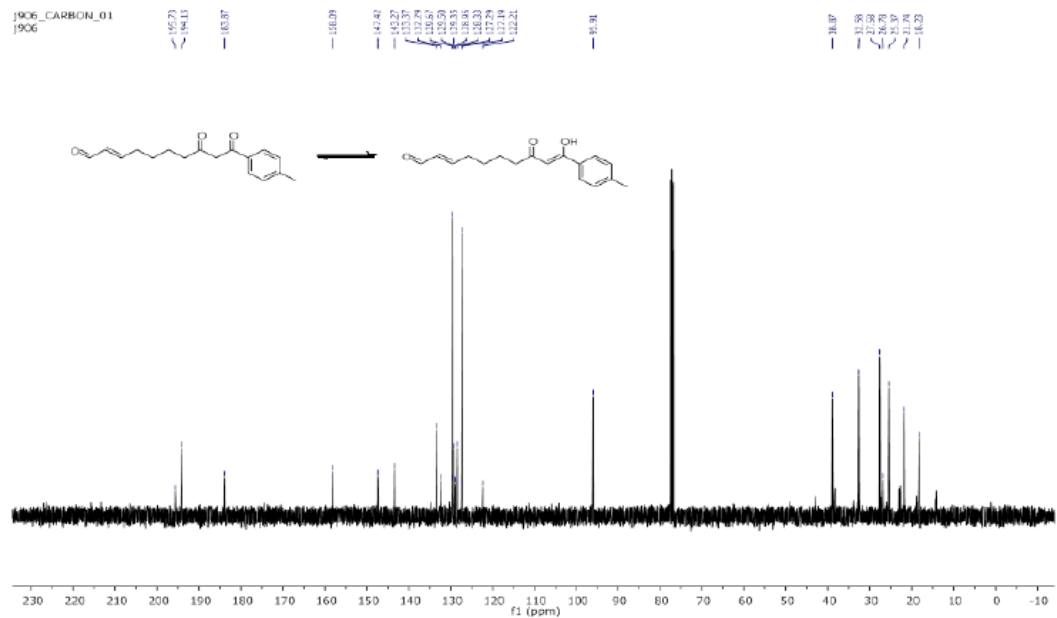

3e

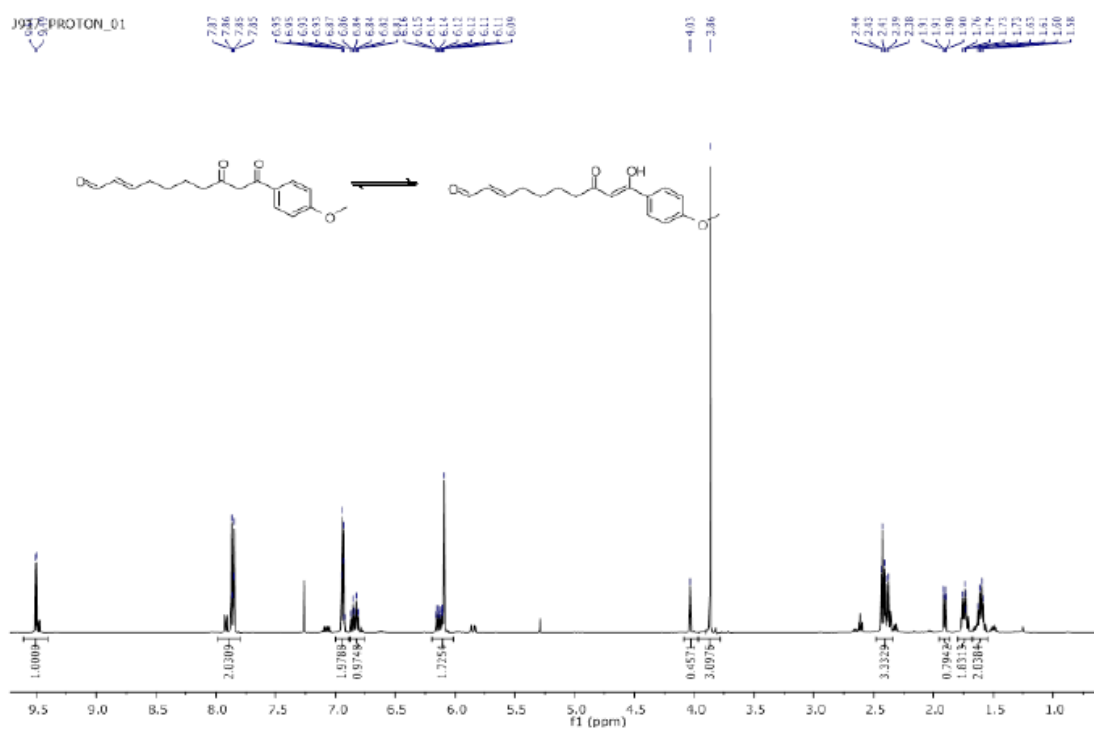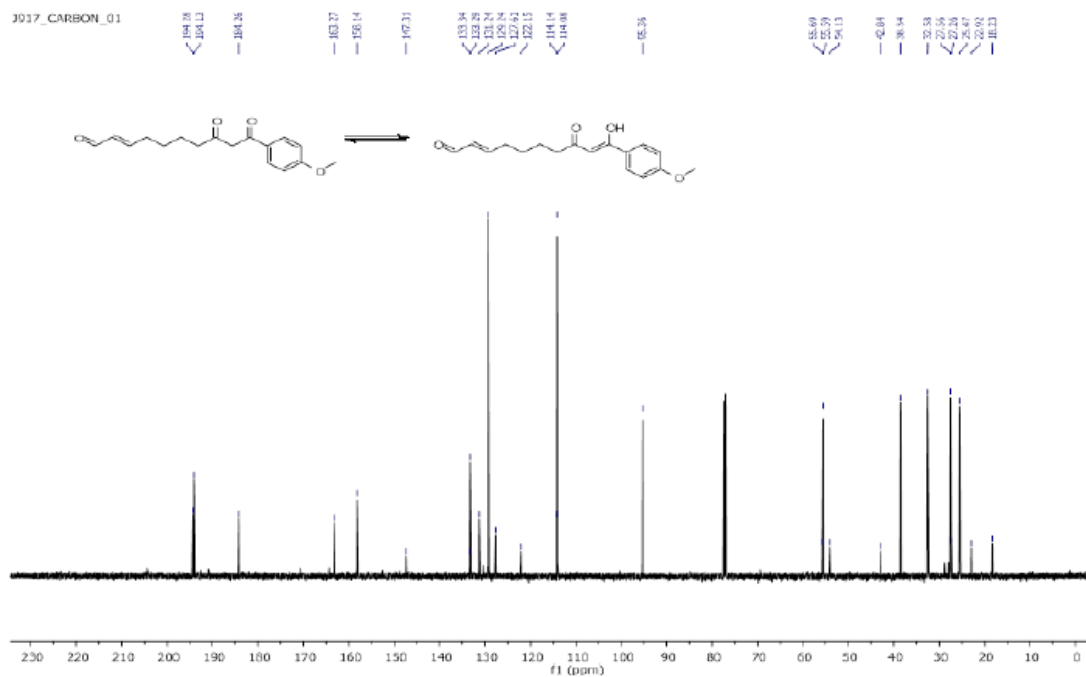

3f

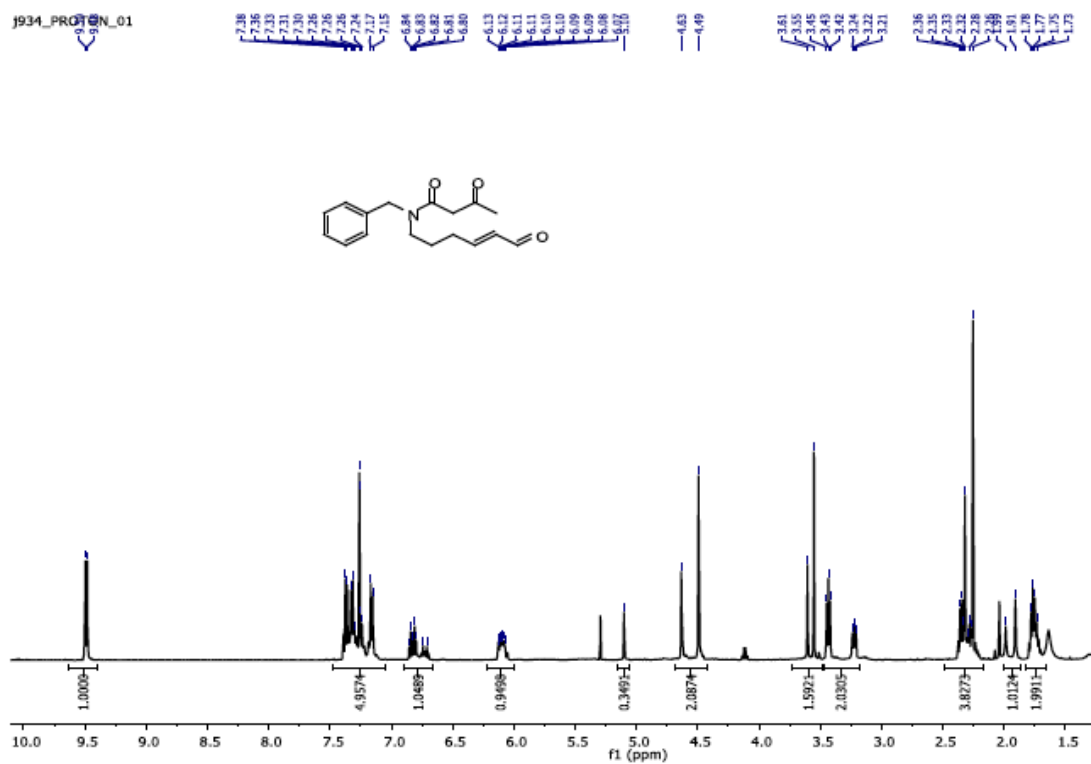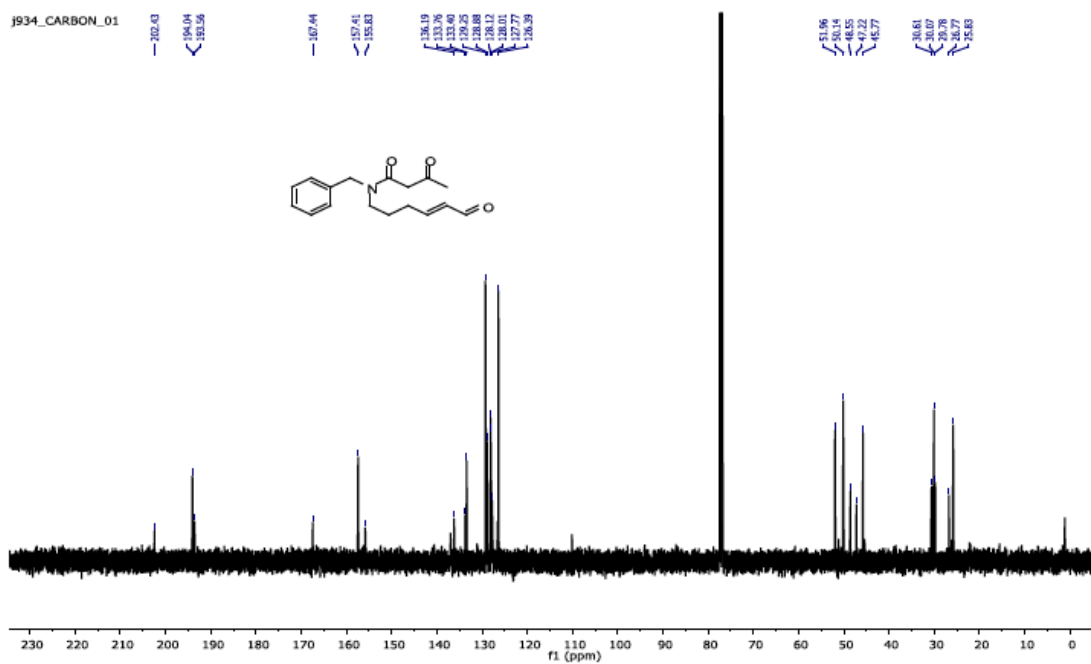

6c

1864\_PROTONS\_01

7.89, 7.87, 7.87, 7.53, 7.47, 7.45, 6.89, 6.87, 6.85, 6.84, 6.84, 6.82, 6.17, 6.15, 5.97, 5.97, 5.84, 5.84, 4.13, 4.11, 4.10

2.51, 2.49, 2.48, 2.44, 2.43, 2.35, 2.33, 2.32, 2.31, 2.31

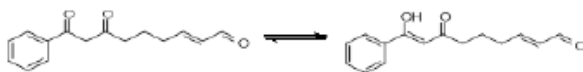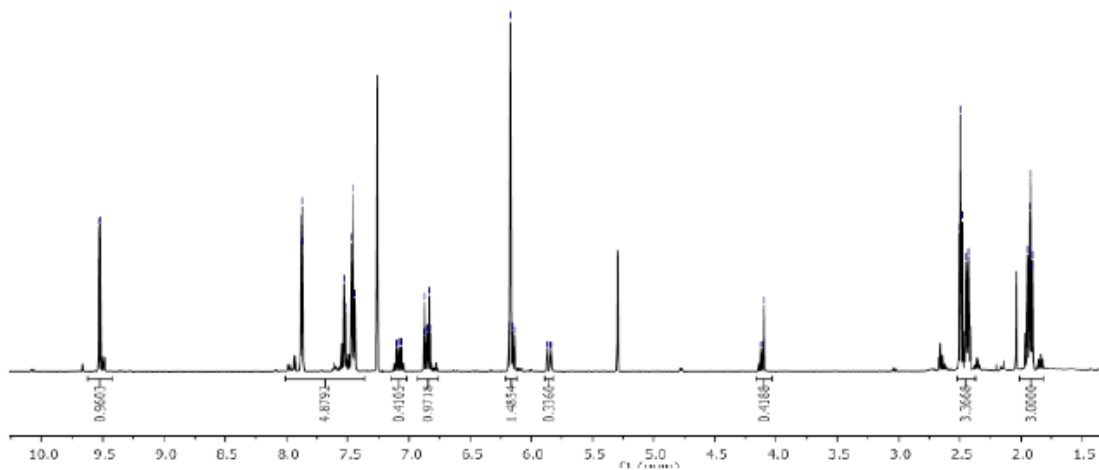

1864\_CARBON\_01

195.92, 194.08, 183.38, 157.32, 147.62, 134.84, 132.88, 132.87, 132.81, 127.14, 76.40, 38.89, 32.18, 22.87, 18.26

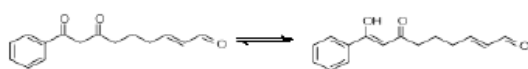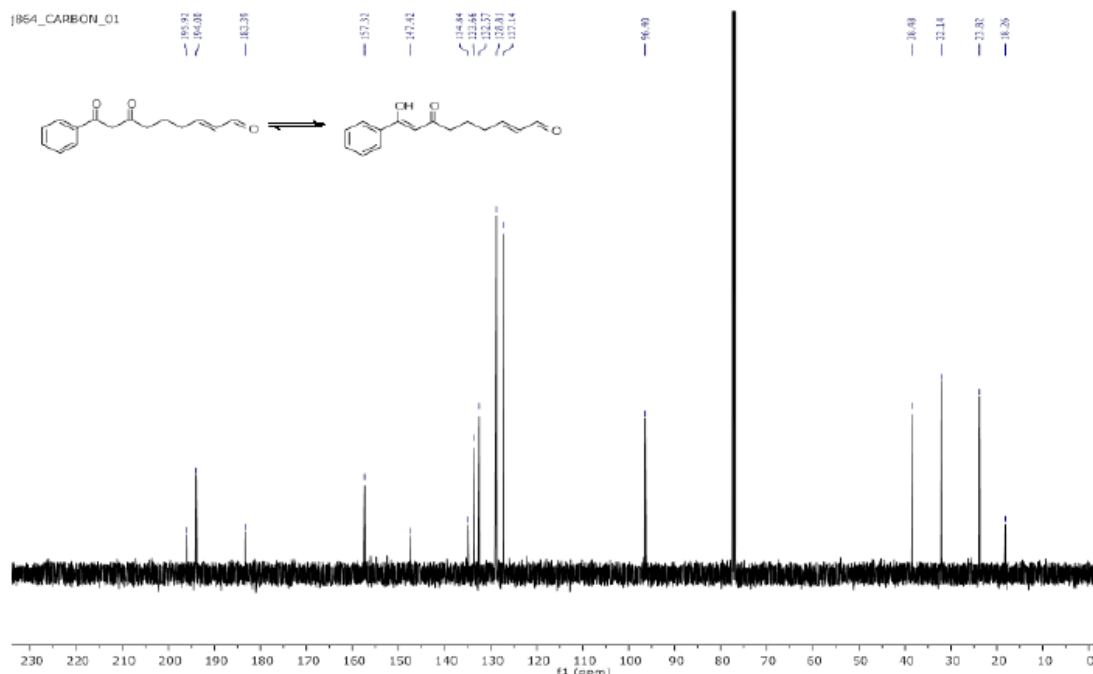

6e

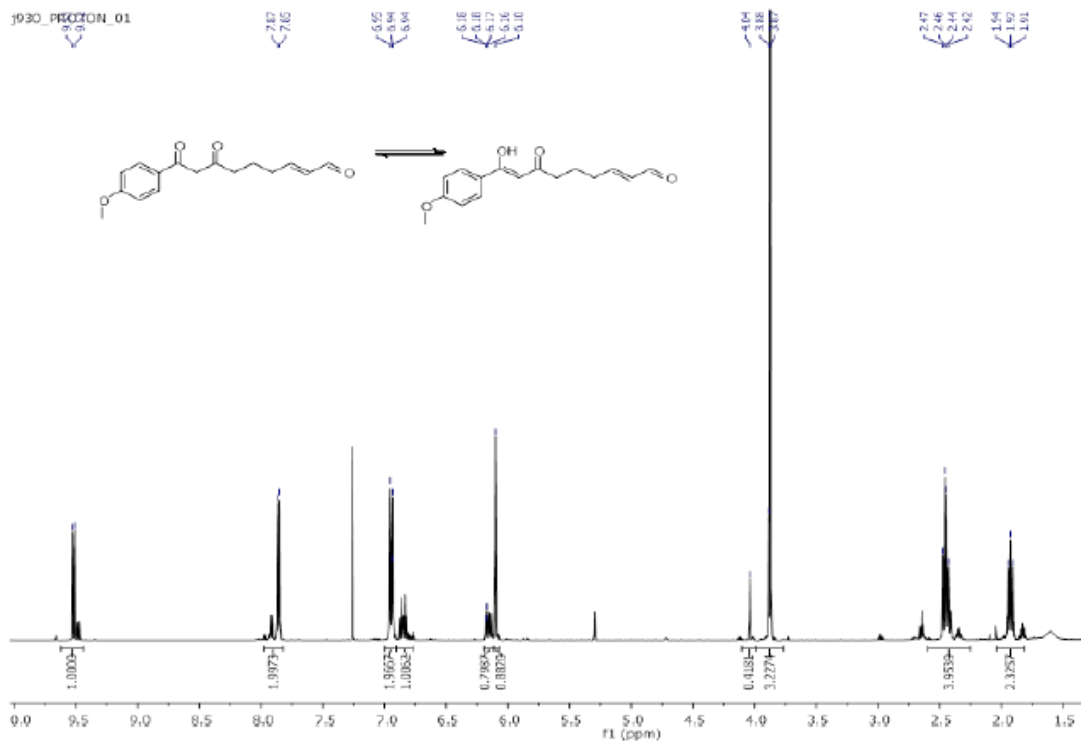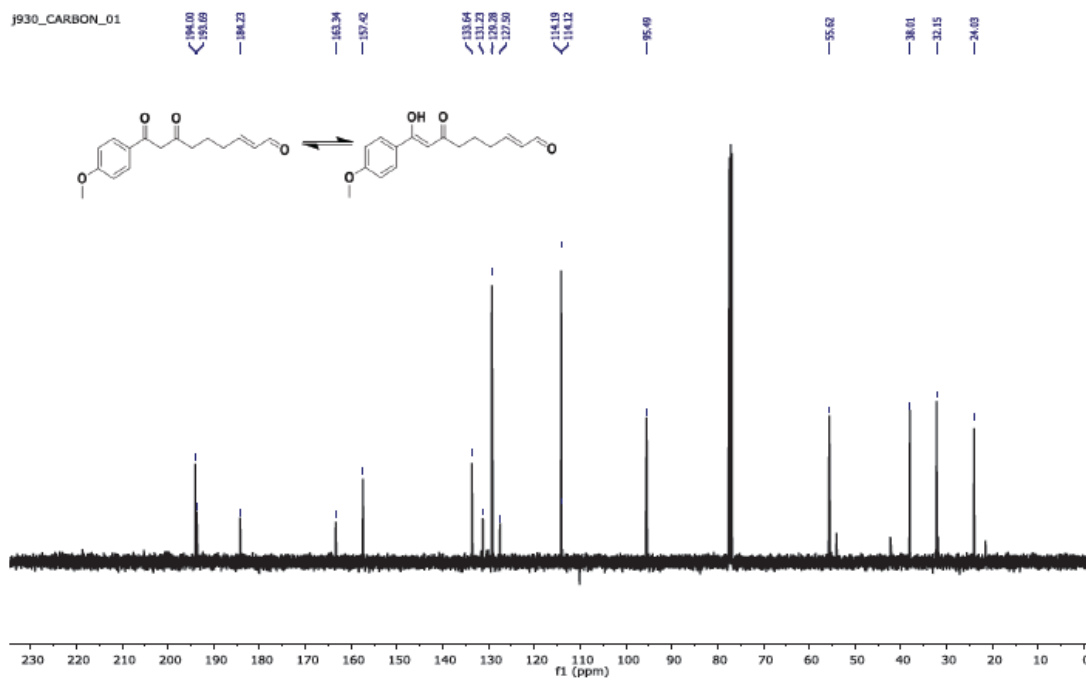



6f

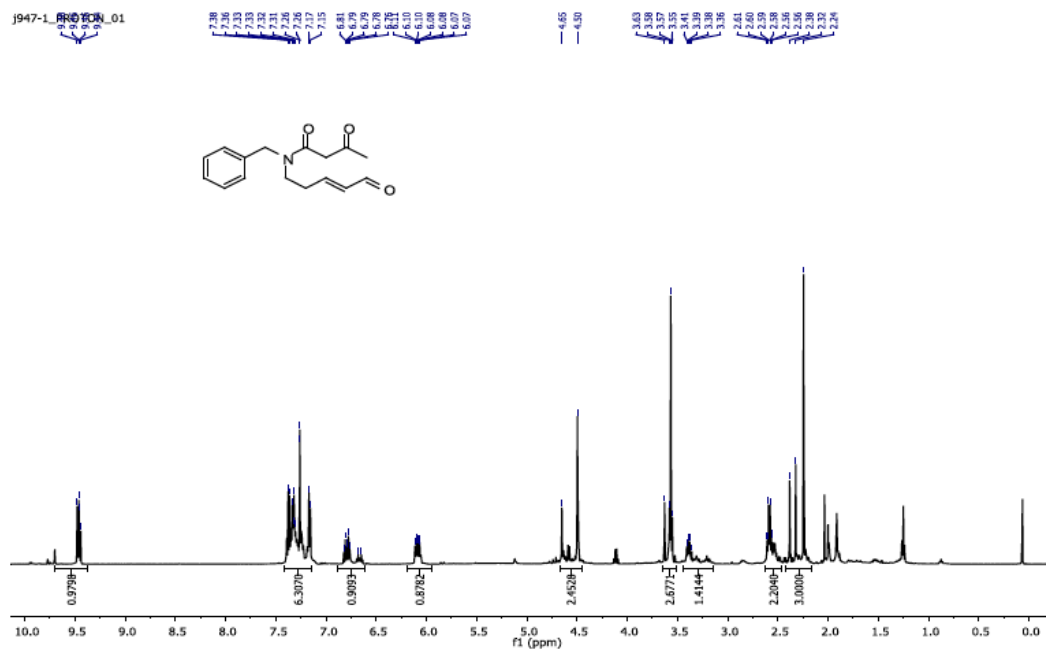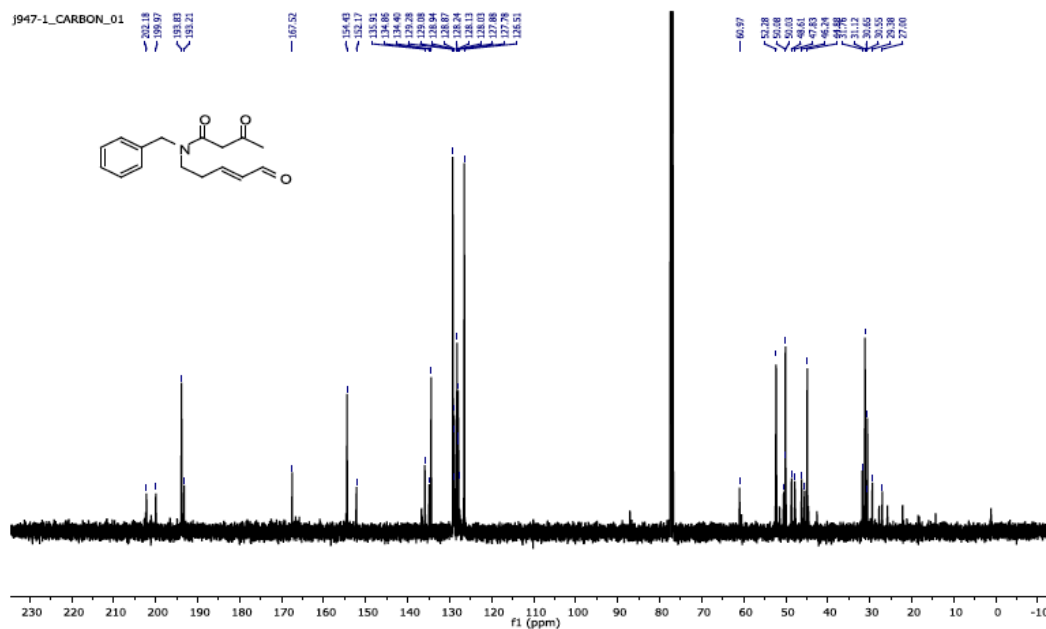



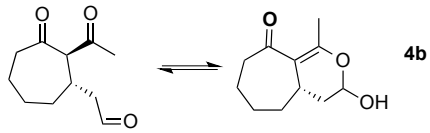

905\_FRACTION\_01

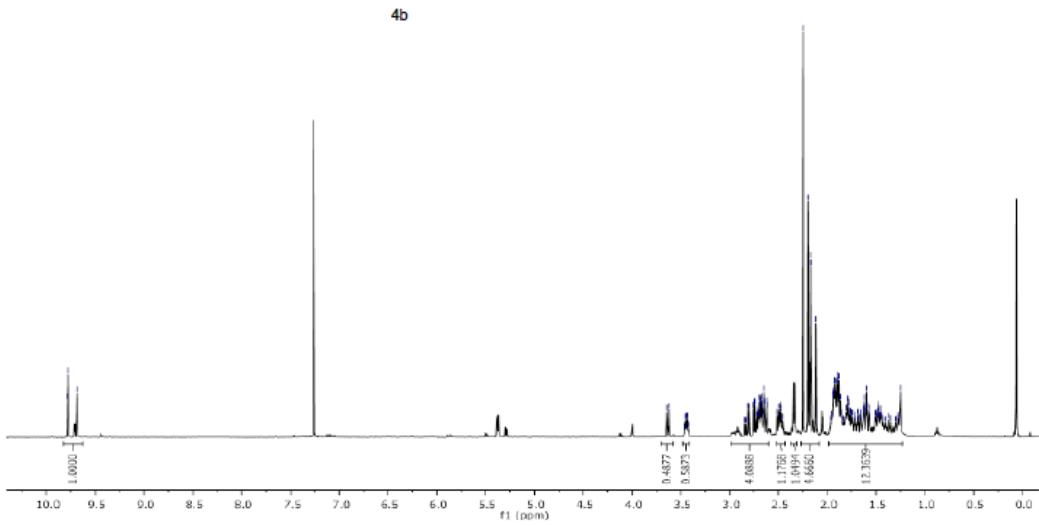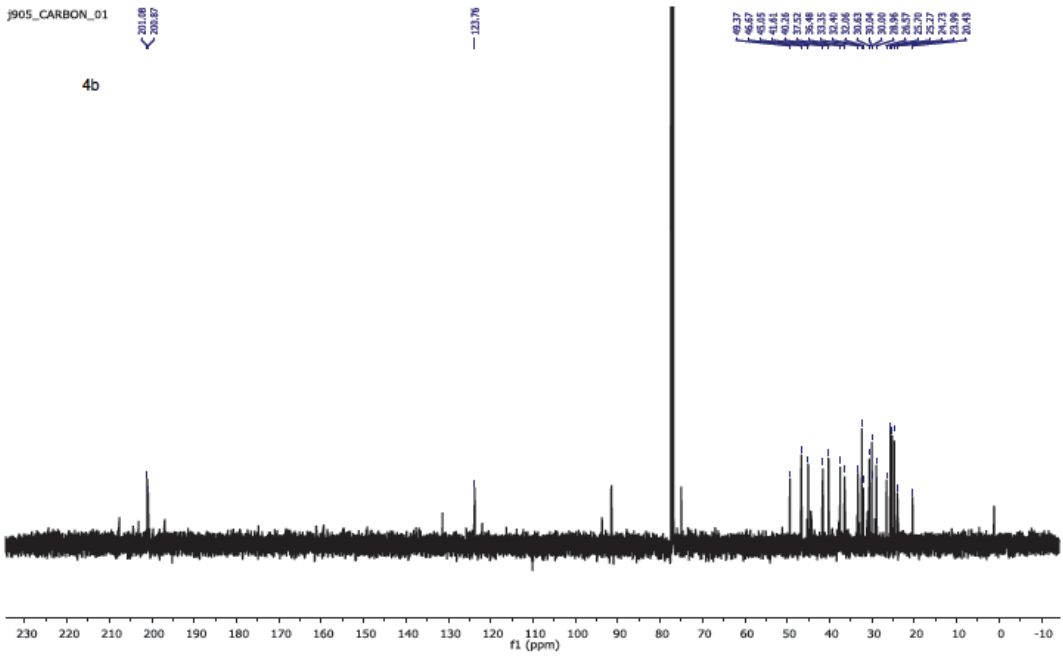

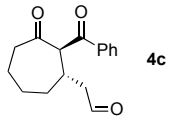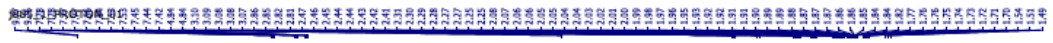

**4c**

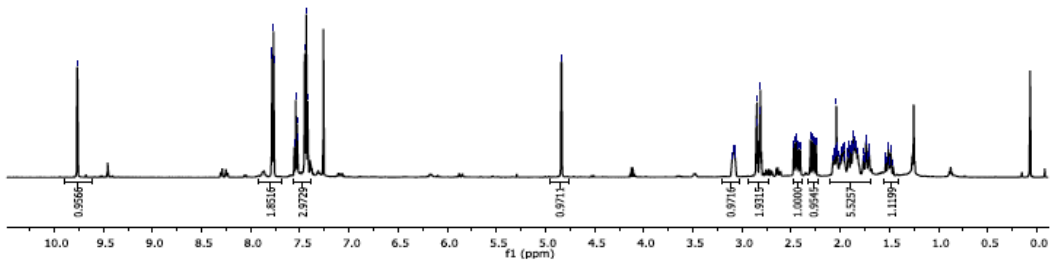

j885\_1\_CARBON  
 207.66  
 201.20  
 198.81

138.94  
 138.91  
 138.86  
 137.25

81.85

44.88

44.82

31.80

31.31

31.84

**4c**

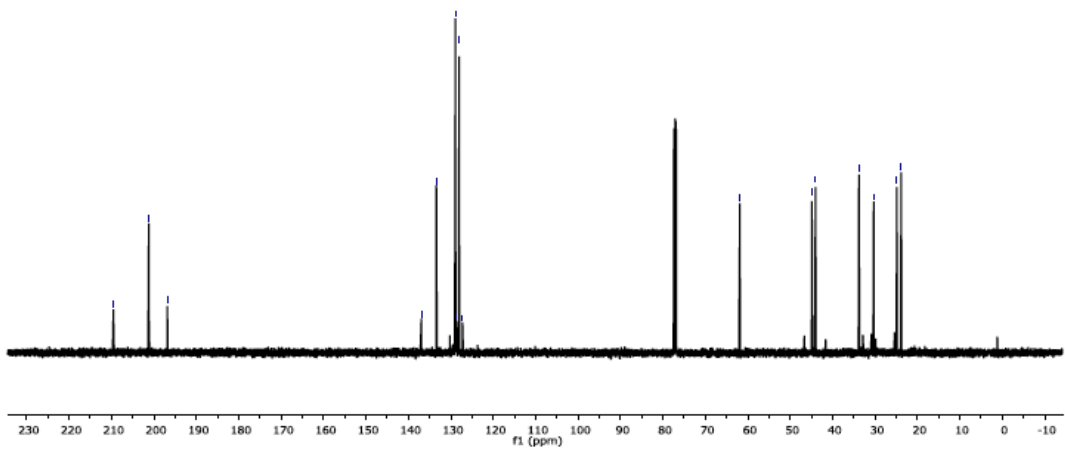





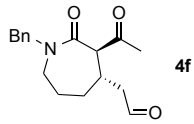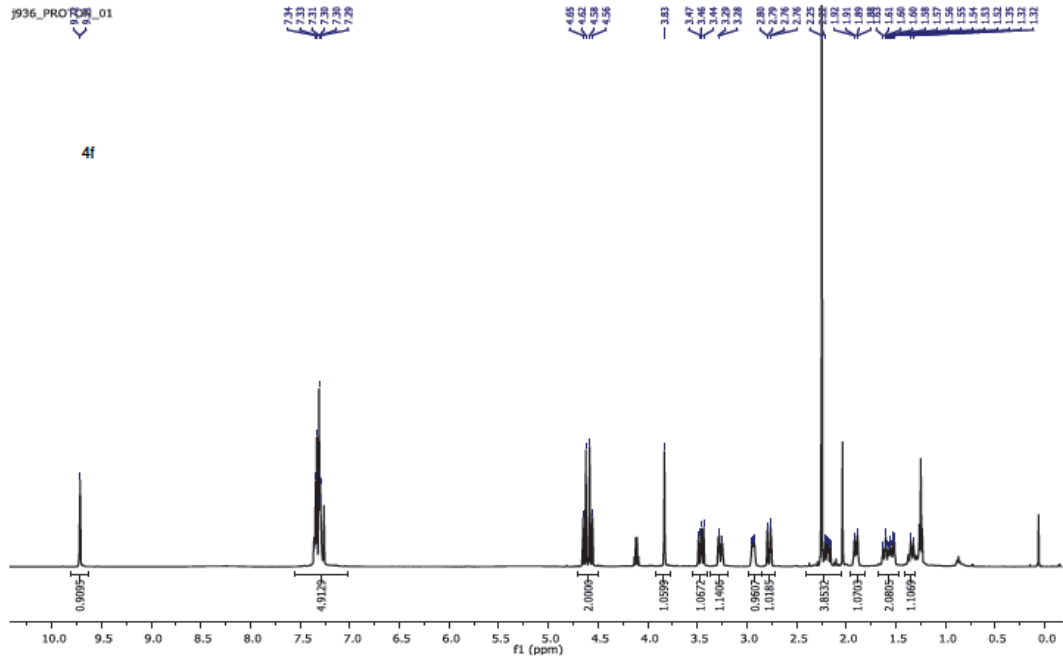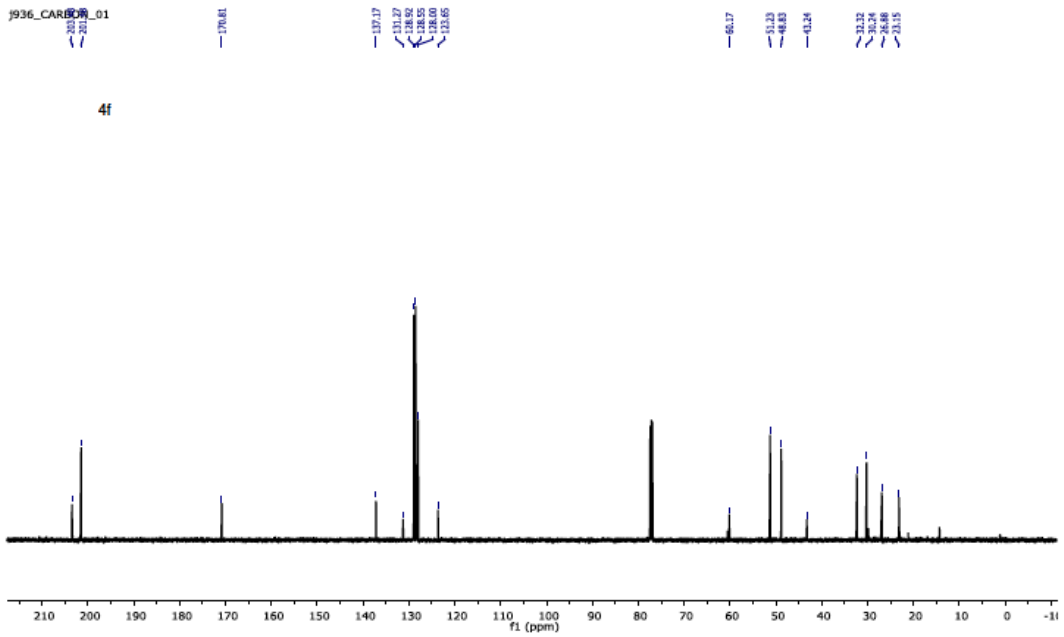

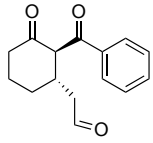

7c

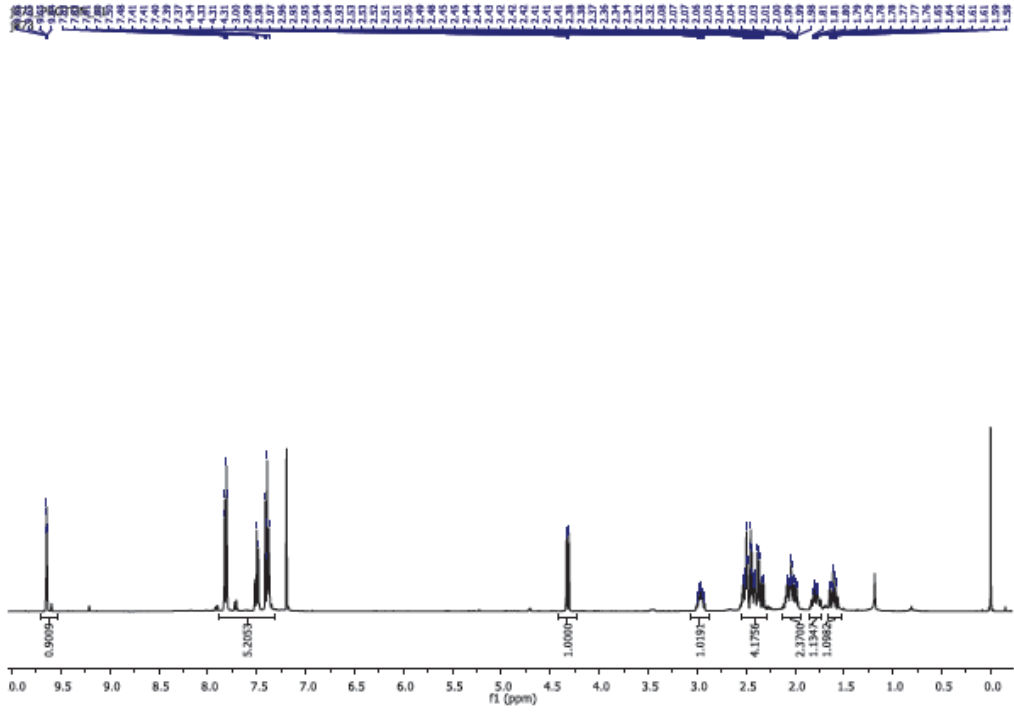

1873 CARBON\_01  
1873

137.51  
133.44  
128.88  
128.55

63.82  
48.17  
41.87  
35.82  
29.57  
24.34

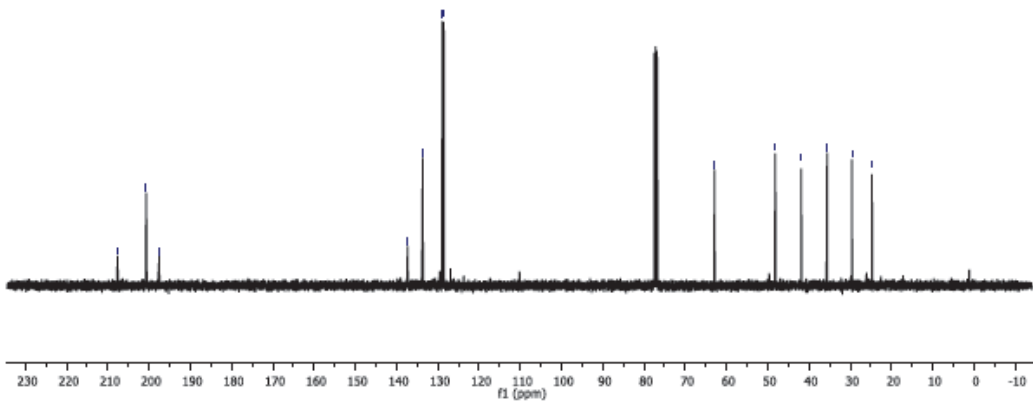



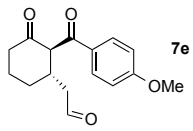

1\_933\_PHASEON\_01

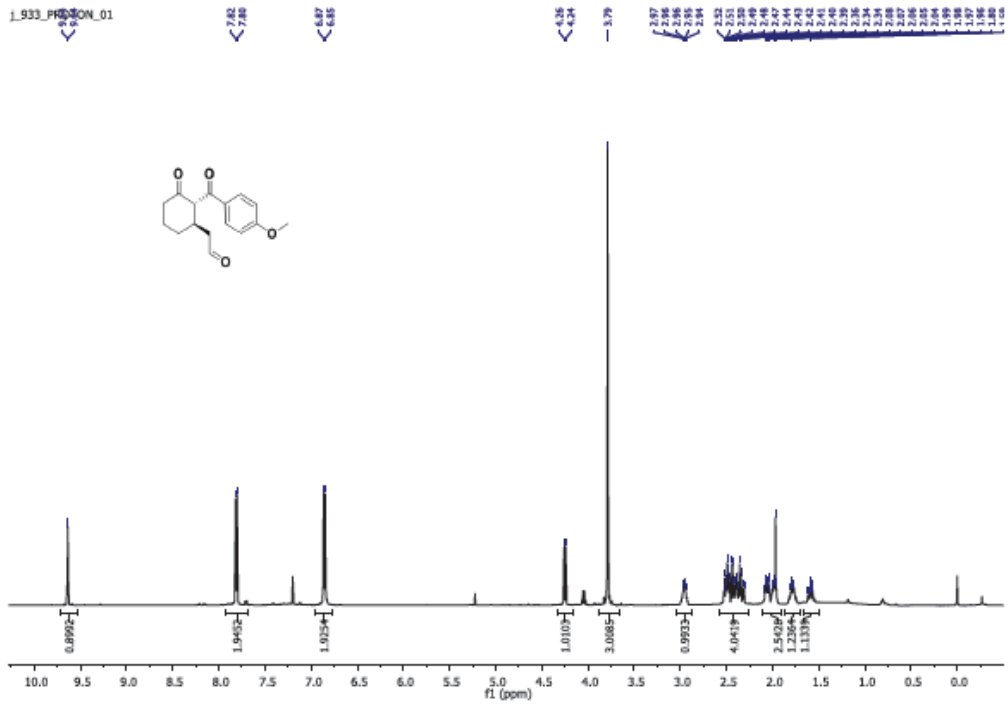

1\_933\_CARBON\_01

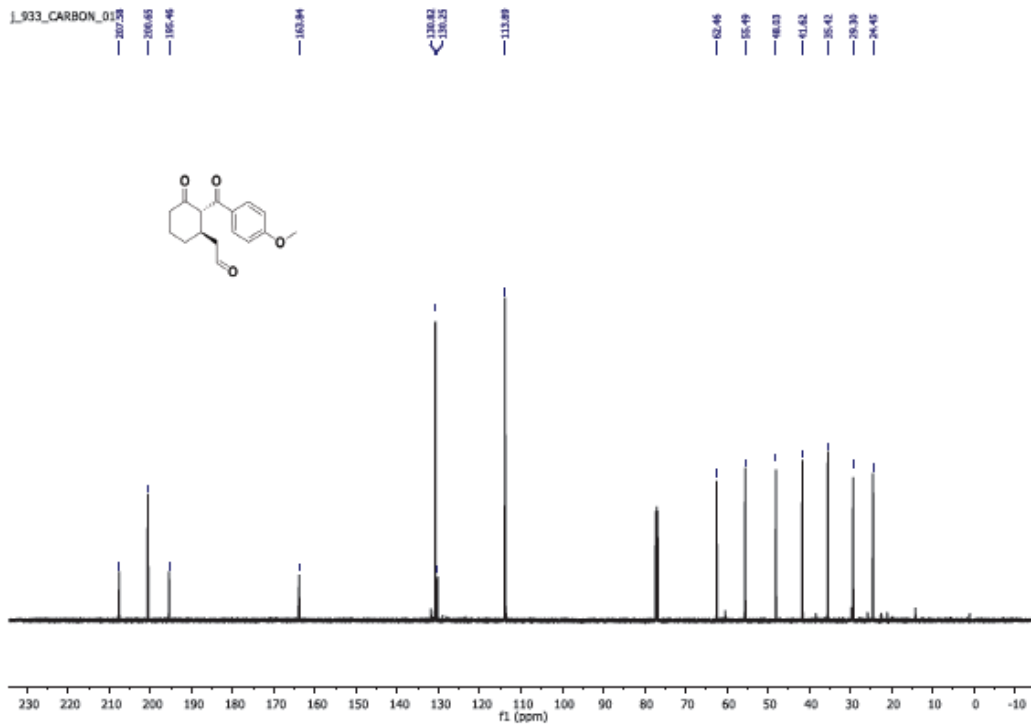



# COSY and NOESY Spectra for 7e

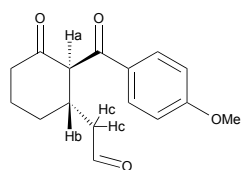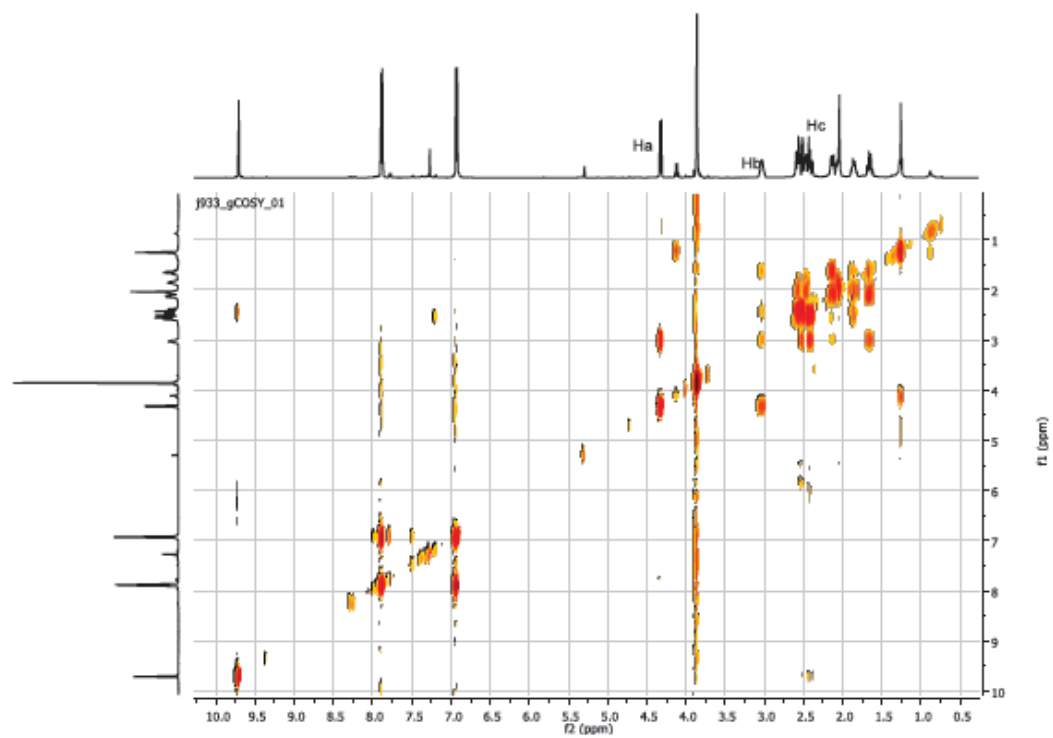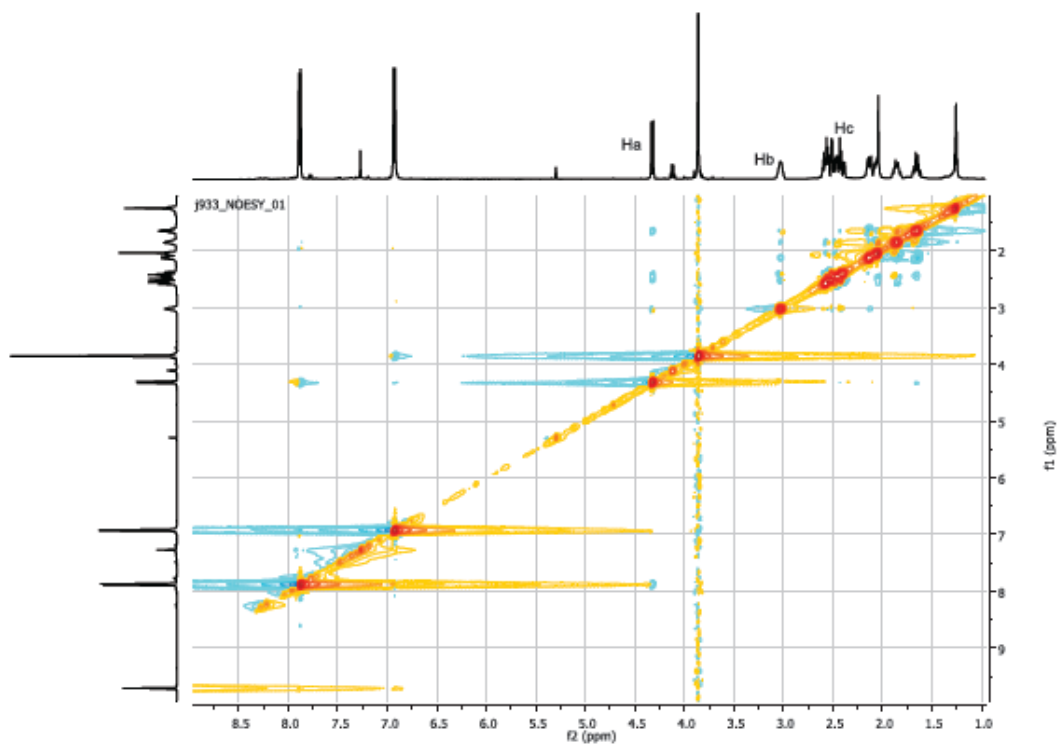

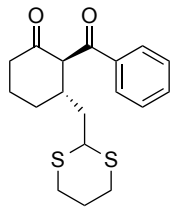

9

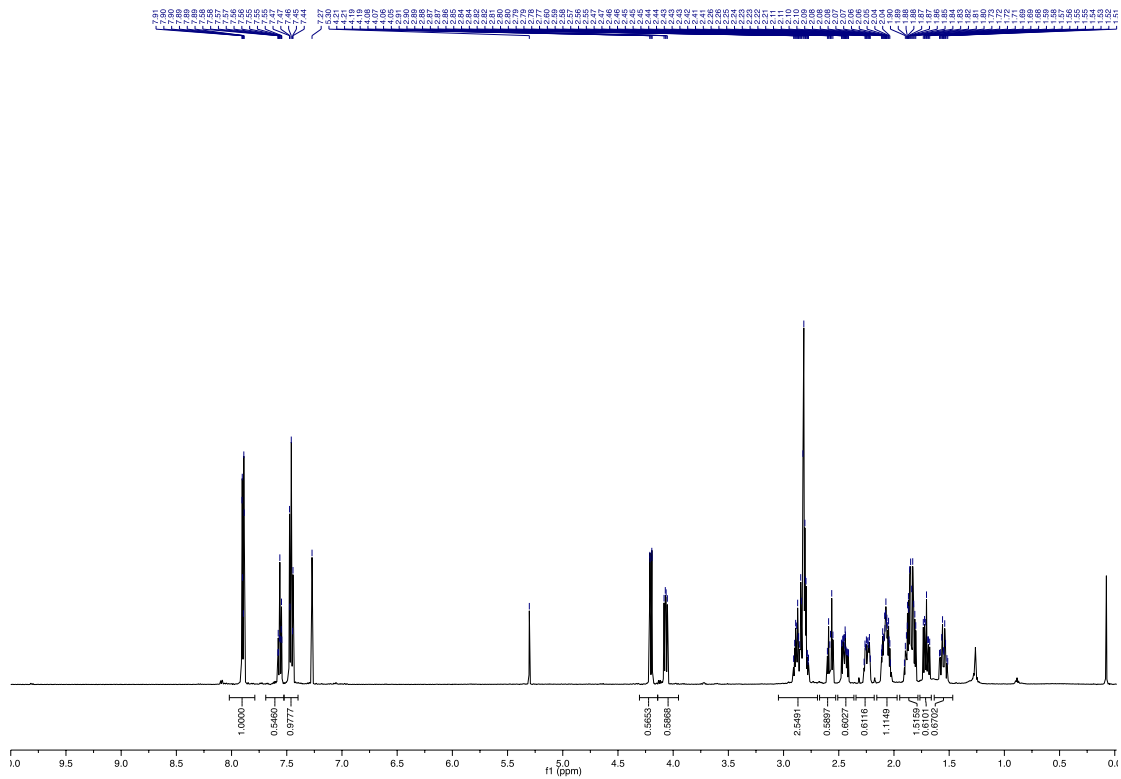



## Rac-4a

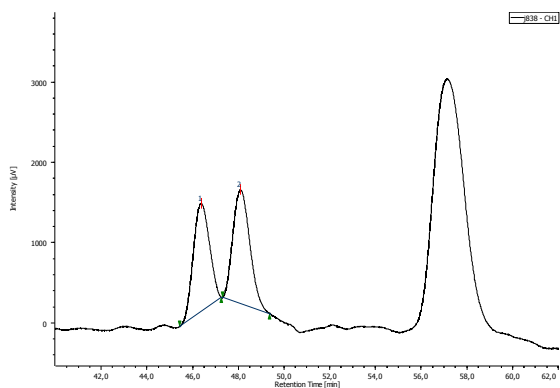

| Peak Name | tR     | Area  | Height | Area%  | Height% | NTP   | Resolution | Symmetry Factor |
|-----------|--------|-------|--------|--------|---------|-------|------------|-----------------|
| 1         | 46,383 | 65684 | 1337   | 47,434 | 48,590  | 18768 | 1,240      | 1,018           |
| 2         | 48,075 | 72790 | 1414   | 52,566 | 51,410  | 19355 | N/A        | 1,234           |

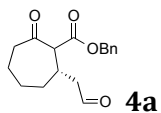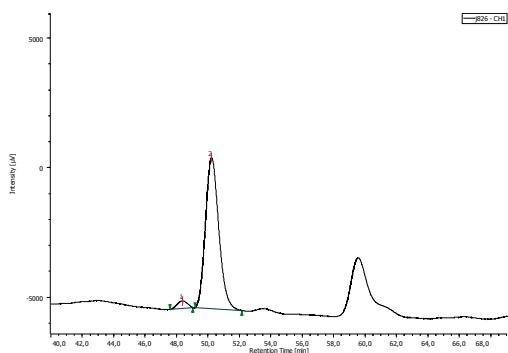

| Peak Name | tR     | Area   | Height | Area%  | Height% | NTP   | Resolution | Symmetry Factor |
|-----------|--------|--------|--------|--------|---------|-------|------------|-----------------|
| 1         | 48,358 | 12932  | 289    | 3,638  | 4,741   | 23400 | 1,326      | 0,960           |
| 2         | 50,217 | 342554 | 5802   | 96,362 | 95,259  | 16872 | N/A        | 1,191           |

## Rac-4b

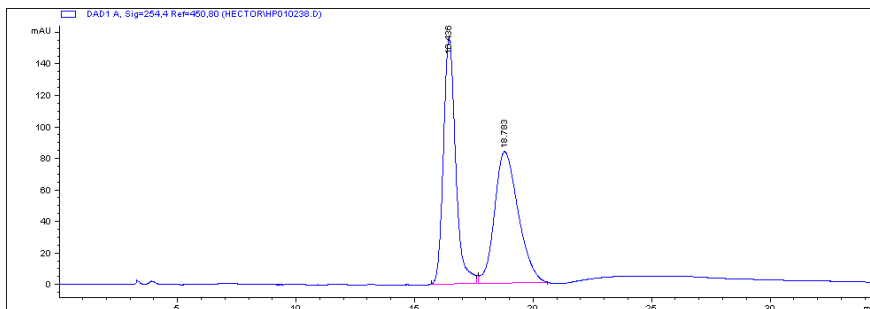

| # | Time   | Area   | Height | Width  | Area%  | Symmetry |
|---|--------|--------|--------|--------|--------|----------|
| 1 | 16.436 | 5629.2 | 156.6  | 0.5346 | 48.964 | 0.785    |
| 2 | 18.783 | 5867.5 | 83.8   | 0.9063 | 51.036 | 0.729    |

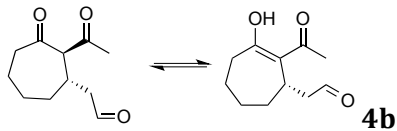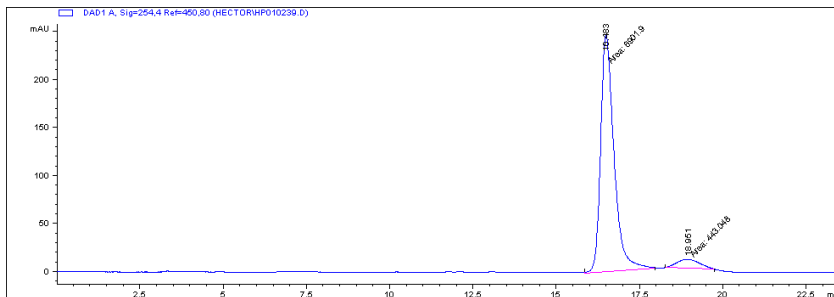

| # | Time   | Area   | Height | Width  | Area%  | Symmetry |
|---|--------|--------|--------|--------|--------|----------|
| 1 | 16.483 | 6901.9 | 246.4  | 0.4668 | 93.968 | 0.636    |
| 2 | 18.951 | 443    | 9.2    | 0.7992 | 6.032  | 0.851    |

## Rac-4c

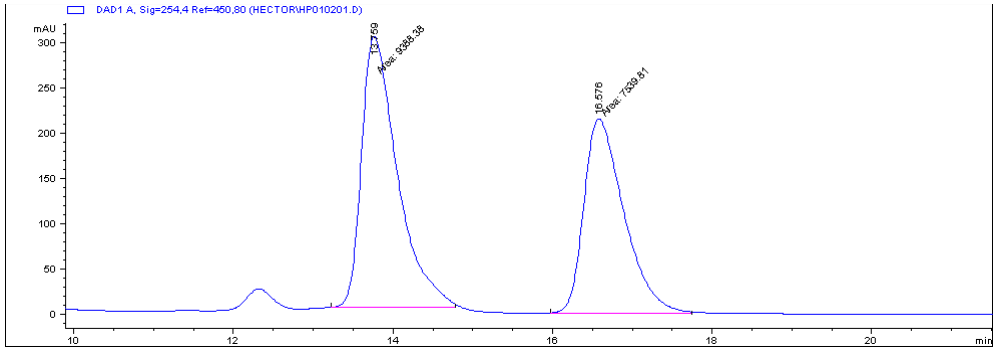

| # | Time   | Area   | Height | Width  | Area%  | Symmetry |
|---|--------|--------|--------|--------|--------|----------|
| 1 | 13.759 | 9388.4 | 299.3  | 0.5228 | 55.460 | 0.531    |
| 2 | 16.576 | 7539.8 | 214.9  | 0.5848 | 44.540 | 0.583    |

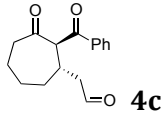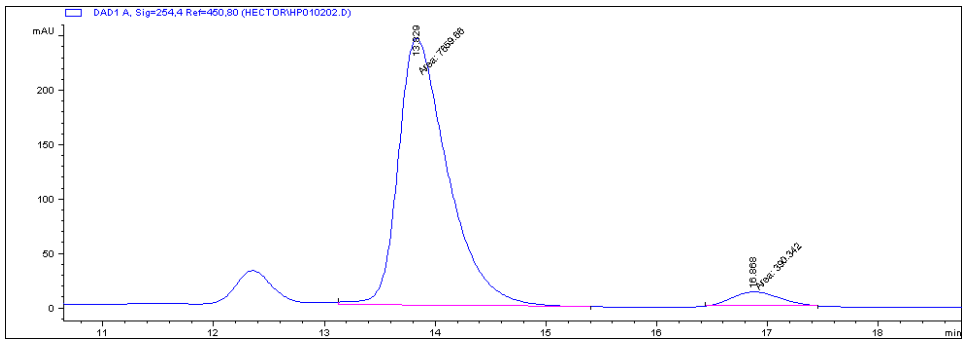

| # | Time   | Area   | Height | Width  | Area%  | Symmetry |
|---|--------|--------|--------|--------|--------|----------|
| 1 | 13.829 | 7659.7 | 245.6  | 0.5197 | 95.151 | 0.579    |
| 2 | 16.868 | 390.3  | 13     | 0.4989 | 4.849  | 0.789    |



## Rac-4d

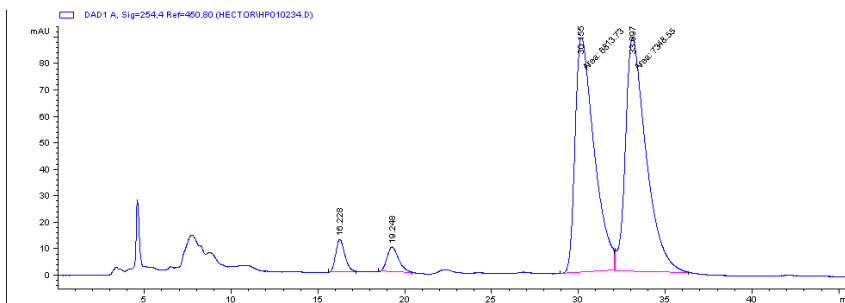

| # | Time   | Area   | Height | Width  | Area%  | Symmetry |
|---|--------|--------|--------|--------|--------|----------|
| 1 | 16.228 | 453.6  | 12.4   | 0.4734 | 3.013  | 0.746    |
| 2 | 19.248 | 438.1  | 9.5    | 0.5533 | 2.910  | 0.757    |
| 3 | 30.155 | 6813.7 | 88.7   | 1.28   | 45.262 | 0.482    |
| 4 | 33.097 | 7348.5 | 88.2   | 1.3881 | 48.815 | 0.504    |

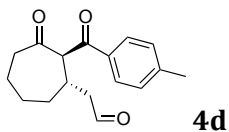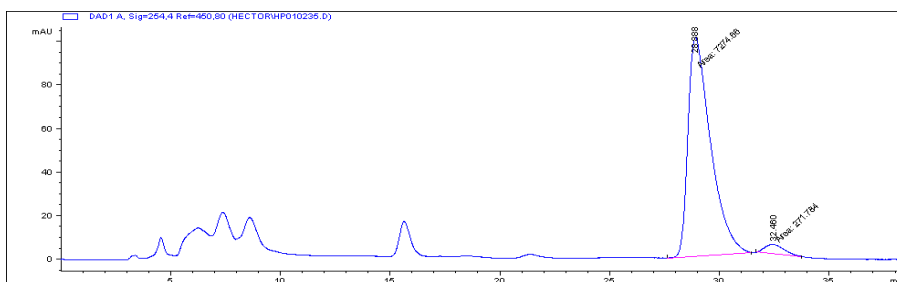

| # | Time   | Area   | Height | Width  | Area%  | Symmetry |
|---|--------|--------|--------|--------|--------|----------|
| 1 | 28.888 | 7274.7 | 100.6  | 1.2047 | 96.399 | 0.474    |
| 2 | 32.46  | 271.8  | 4.4    | 1.0406 | 3.601  | 0.565    |

## Rac-4e

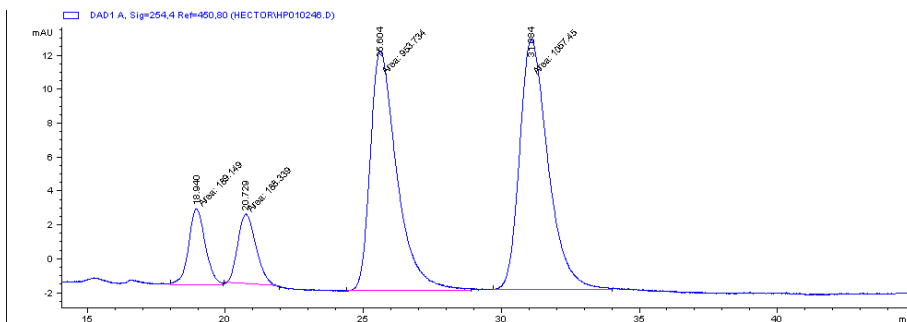

| # | Time   | Area   | Height | Width  | Area%  | Symmetry |
|---|--------|--------|--------|--------|--------|----------|
| 1 | 18.94  | 189.1  | 4.5    | 0.7033 | 7.919  | 0.877    |
| 2 | 20.729 | 188.3  | 4.1    | 0.7582 | 7.885  | 0.778    |
| 3 | 25.604 | 953.7  | 14.1   | 1.1234 | 39.927 | 0.589    |
| 4 | 31.084 | 1057.5 | 14.7   | 1.1961 | 44.269 | 0.707    |

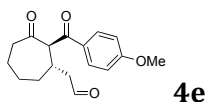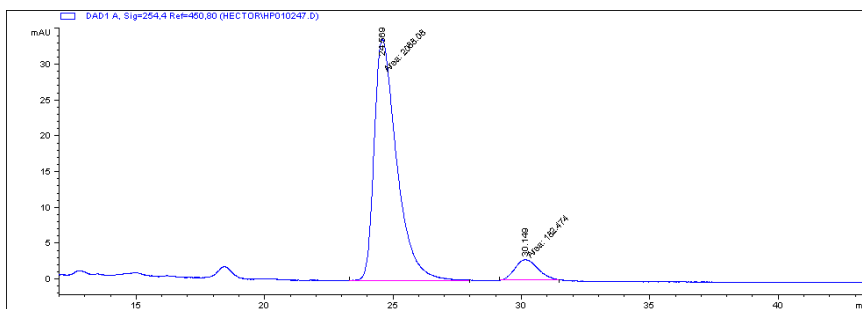

| # | Time   | Area   | Height | Width  | Area%  | Symmetry |
|---|--------|--------|--------|--------|--------|----------|
| 1 | 24.569 | 2088.1 | 33.8   | 1.0294 | 91.963 | 0.542    |
| 2 | 30.149 | 182.5  | 2.9    | 1.045  | 8.037  | 0.832    |

## Rac-4f

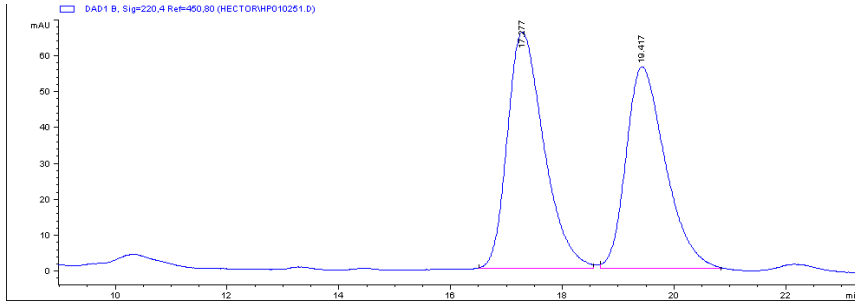

| # | Time   | Area   | Height | Width  | Area%  | Symmetry |
|---|--------|--------|--------|--------|--------|----------|
| 1 | 17.277 | 3002.2 | 65.9   | 0.6596 | 52.102 | 0.661    |
| 2 | 19.417 | 2760   | 56.3   | 0.6521 | 47.898 | 0.634    |

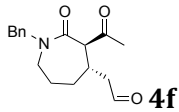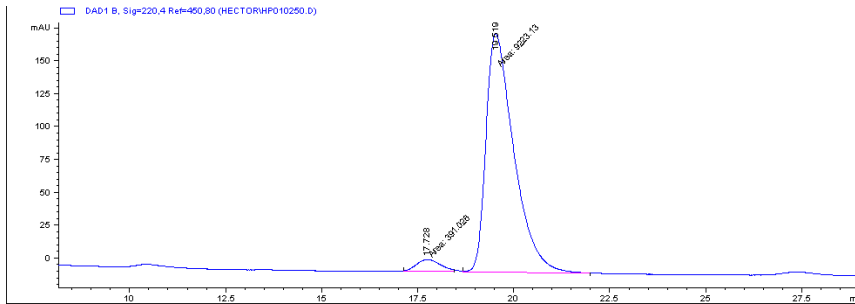

| # | Time   | Area   | Height | Width  | Area%  | Symmetry |
|---|--------|--------|--------|--------|--------|----------|
| 1 | 17.728 | 391    | 9.1    | 0.7149 | 4.067  | 0.758    |
| 2 | 19.519 | 9223.1 | 181.4  | 0.8476 | 95.933 | 0.507    |

## Rac-7c

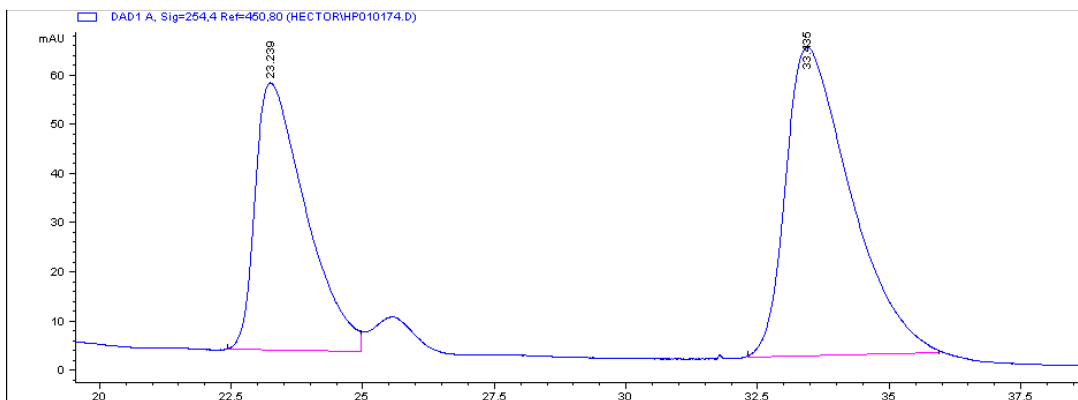

| # | Time   | Area   | Height | Width  | Area%  | Symmetry |
|---|--------|--------|--------|--------|--------|----------|
| 1 | 23.239 | 3660   | 54.5   | 0.8889 | 40.260 | 0.407    |
| 2 | 33.435 | 5430.9 | 63     | 1.0256 | 59.740 | 0.487    |

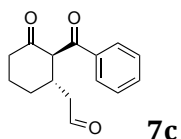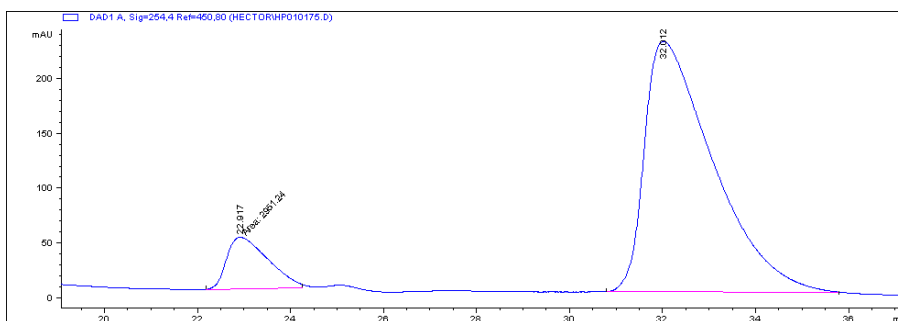

| # | Time   | Area    | Height | Width  | Area%  | Symmetry |
|---|--------|---------|--------|--------|--------|----------|
| 1 | 22.917 | 2951.2  | 47.6   | 1.0326 | 11.153 | 0.493    |
| 2 | 32.012 | 23509.7 | 228.8  | 1.346  | 88.847 | 0.359    |

# Rac-7e

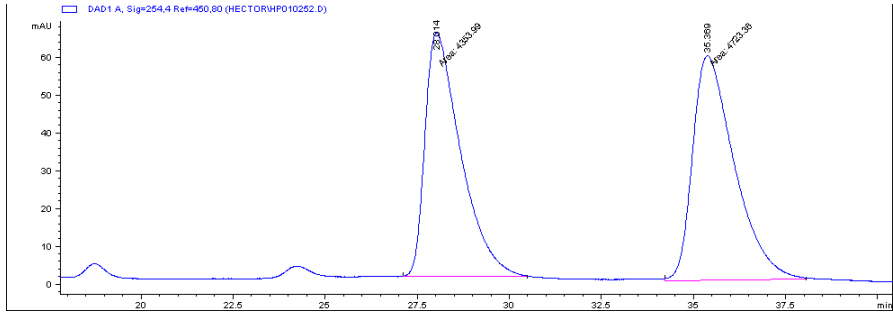

| # | Time   | Area   | Height | Width  | Area%  | Symmetry |
|---|--------|--------|--------|--------|--------|----------|
| 1 | 28.014 | 4354   | 64.5   | 1.1255 | 47.965 | 0.463    |
| 2 | 35.369 | 4723.4 | 59.5   | 1.3236 | 52.035 | 0.534    |

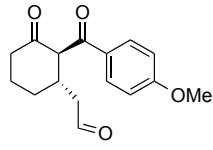

**7e**

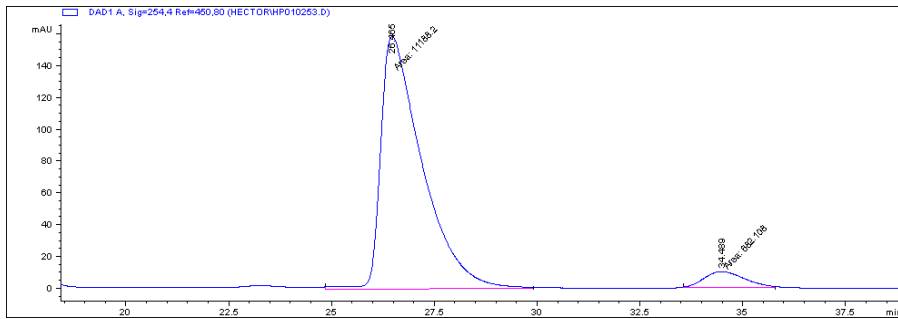

| # | Time   | Area    | Height | Width  | Area%  | Symmetry |
|---|--------|---------|--------|--------|--------|----------|
| 1 | 26.465 | 11188.2 | 159.1  | 1.172  | 94.254 | 0.379    |
| 2 | 34.489 | 682.1   | 10     | 1.1361 | 5.746  | 0.7      |

## Rac-7f

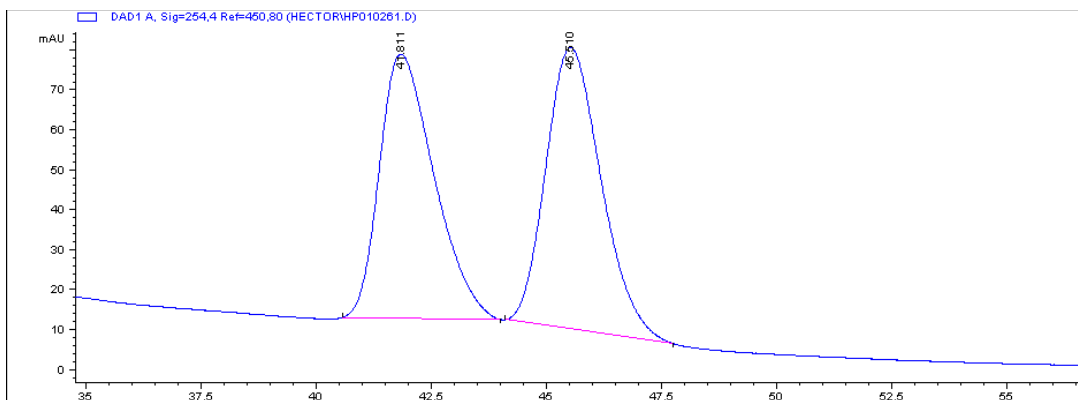

| # | Time   | Area   | Height | Width  | Area%  | Symmetry |
|---|--------|--------|--------|--------|--------|----------|
| 1 | 41.811 | 5482.5 | 66.3   | 0.9908 | 48.078 | 0.592    |
| 2 | 45.51  | 5920.8 | 70.5   | 0.9954 | 51.922 | 0.757    |

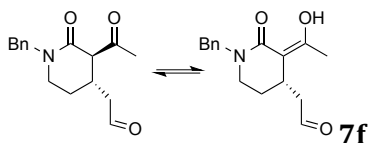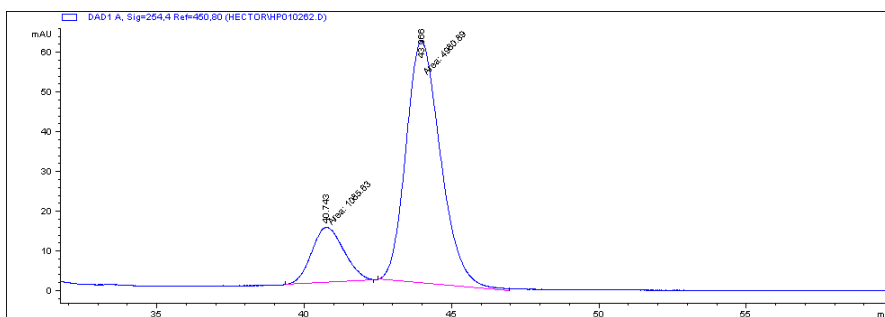

| # | Time   | Area   | Height | Width  | Area%  | Symmetry |
|---|--------|--------|--------|--------|--------|----------|
| 1 | 40.743 | 1085.6 | 14.1   | 1.2875 | 17.895 | 0.843    |
| 2 | 43.966 | 4980.9 | 60.9   | 1.3626 | 82.105 | 0.768    |

# Rac-10

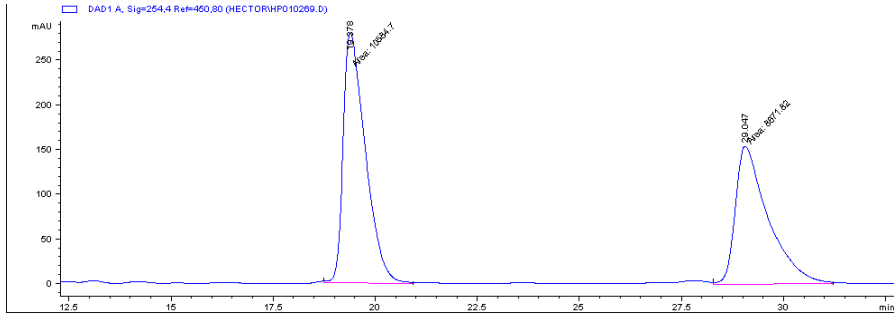

| # | Time   | Area    | Height | Width  | Area%  | Symmetry |
|---|--------|---------|--------|--------|--------|----------|
| 1 | 19.378 | 10584.7 | 279.6  | 0.631  | 54.967 | 0.461    |
| 2 | 29.047 | 8671.8  | 154.6  | 0.9349 | 45.033 | 0.419    |

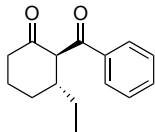

**10**

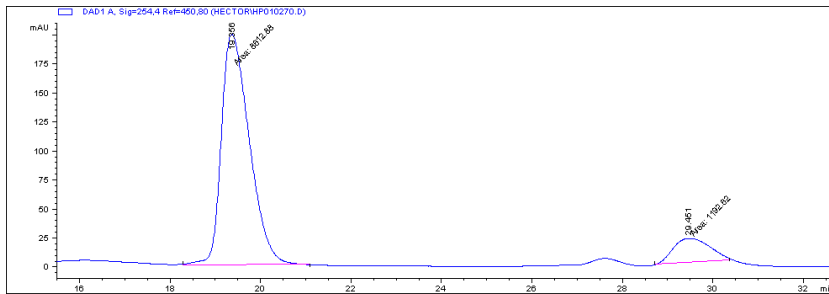

| # | Time   | Area   | Height | Width  | Area%  | Symmetry |
|---|--------|--------|--------|--------|--------|----------|
| 1 | 19.356 | 8612.9 | 199.2  | 0.7205 | 87.837 | 0.594    |
| 2 | 29.451 | 1192.6 | 21     | 0.9465 | 12.163 | 0.722    |
